# Supplementary material for: Profiles of biliary microbiota in biliary obstruction patients with Clonorchis sinensis infection
Source: Frontiers journal article supplement (doi:10.3389/fcimb.2023.1281745), 2023-12-18
Supplement: Table_2.XLSX [file Table_2.XLSX]

## Sheet: corr (Cs-infected)
Table S2(1).The correlation matrix table among the top 30 abundant bacterial genera in Cs-infected group.
	g__Enterococcus	g__Clostridium_sensu_stricto_1	g__Psychrobacter	g__Actinobacillus	g__Rothia	g__Actinomyces	g__Veillonella	g__Granulicatella	g__Fusobacterium	g__Gemella	g__Streptococcus	g__Atopobium	g__Peptostreptococcus	g__Enterobacter	g__Raoultella	g__Acinetobacter	g__unclassified_k__norank_d__Bacteria	g__norank_f__Mitochondria	g__Ralstonia	g__Rhodococcus	g__unclassified_p__Proteobacteria	g__Neisseria	g__Escherichia-Shigella	g__Aerococcus	g__Bacteroides	g__norank_f__Muribaculaceae	g__Stenotrophomonas	g__Pseudomonas	g__Tumebacillus	g__Staphylococcus
g__Enterococcus	1	0.12832	0.15151	0.05566	0.31099	0.34759	0.22181	0.10862	0.27231	0.22278	0.22039	0.18261	0.39279	0.11044	0.02731	-0.02001	0.04288	0.2388	-0.04265	0.12491	-0.21559	-0.0475	-0.07801	-0.187	0.14687	-0.01913	-0.07096	-0.16955	0.30377	-0.02744
g__Clostridium_sensu_stricto_1	0.12832	1	-0.07908	-0.33774	0.43469	0.11858	0.27024	0.11689	0.10752	0.15851	0.00332	0.12102	0.22957	-0.20681	-0.05424	-0.15707	0.1227	-0.07626	0.10051	-0.07638	0.09135	0.08245	0.22397	-0.14551	0.26424	0.37884	0.48213	0.44572	0.11552	-0.14952
g__Psychrobacter	0.15151	-0.07908	1	0.83534	0.11079	0.01158	0.07817	0.1401	-0.00521	0.03529	0.36065	0.22347	0.43538	-0.2264	0.07294	0.25034	0.24463	0.38475	0.35407	0.33805	-0.01693	0.0444	-0.30245	-0.32011	0.03628	-0.08371	-0.01223	-0.2224	0.13725	0.46918
g__Actinobacillus	0.05566	-0.33774	0.83534	1	-0.03102	0.12539	0.1277	0.35934	0.18473	0.23562	0.36872	0.35978	0.36998	-0.18807	-0.13226	0.26722	0.1069	0.24082	0.22535	0.16544	-0.00752	0.11252	-0.46786	-0.25862	-0.2298	-0.36029	-0.20757	-0.32843	-0.03105	0.35089
g__Rothia	0.31099	0.43469	0.11079	-0.03102	1	0.48037	0.672	0.56791	0.38042	0.34746	0.53861	0.45955	0.55429	-0.26275	-0.14135	-0.0441	0.1068	0.12432	0.20182	0.06438	0.08121	0.20221	0.06516	0.11663	0.05808	0.13261	0.02444	-0.06993	-0.04965	0.20834
g__Actinomyces	0.34759	0.11858	0.01158	0.12539	0.48037	1	0.72133	0.69187	0.70112	0.6774	0.59527	0.60251	0.51379	-0.3008	-0.58777	0.28053	0.18795	0.13023	0.31219	0.21285	0.32567	0.63466	-0.36497	-0.2982	0.04454	-0.03702	-0.0924	-0.04807	-0.16414	-0.22611
g__Veillonella	0.22181	0.27024	0.07817	0.1277	0.672	0.72133	1	0.69667	0.71145	0.68912	0.56554	0.54582	0.61581	-0.25284	-0.34156	0.28066	0.1572	0.10952	0.13607	0.08379	0.2752	0.34252	-0.24229	-0.01167	-0.14759	-0.13712	-0.10101	-0.22733	-0.0949	-0.05122
g__Granulicatella	0.10862	0.11689	0.1401	0.35934	0.56791	0.69187	0.69667	1	0.75658	0.81903	0.76946	0.81575	0.69664	-0.47947	-0.5283	-0.08139	-0.11422	-0.11129	0.07999	-0.07317	0.02326	0.32112	-0.4255	-0.18029	-0.28731	-0.25453	-0.35186	-0.26082	-0.36137	-0.05698
g__Fusobacterium	0.27231	0.10752	-0.00521	0.18473	0.38042	0.70112	0.71145	0.75658	1	0.94561	0.57455	0.64923	0.65728	-0.35914	-0.59154	-0.07521	-0.11803	-0.21333	0.08725	0.09498	0.14266	0.30071	-0.4874	-0.16376	-0.17722	-0.34017	-0.0736	-0.19815	-0.1563	-0.29678
g__Gemella	0.22278	0.15851	0.03529	0.23562	0.34746	0.6774	0.68912	0.81903	0.94561	1	0.59507	0.68564	0.67966	-0.41678	-0.50851	-0.04165	-0.12304	-0.20477	0.02561	-0.01922	0.09449	0.25162	-0.46867	-0.24593	-0.24822	-0.26669	-0.18789	-0.15938	-0.15264	-0.25926
g__Streptococcus	0.22039	0.00332	0.36065	0.36872	0.53861	0.59527	0.56554	0.76946	0.57455	0.59507	1	0.75786	0.73959	-0.45071	-0.37214	-0.06379	0.07059	0.08253	0.30716	0.21855	0.08455	0.28795	-0.56607	-0.37117	-0.12464	-0.24086	-0.34097	-0.29321	-0.18352	0.02863
g__Atopobium	0.18261	0.12102	0.22347	0.35978	0.45955	0.60251	0.54582	0.81575	0.64923	0.68564	0.75786	1	0.79544	-0.59366	-0.46843	-0.25454	-0.33897	-0.28194	-0.0185	-0.01301	-0.16031	0.19185	-0.60142	-0.3802	-0.32928	-0.47383	-0.38426	-0.40286	-0.1606	-0.24481
g__Peptostreptococcus	0.39279	0.22957	0.43538	0.36998	0.55429	0.51379	0.61581	0.69664	0.65728	0.67966	0.73959	0.79544	1	-0.47843	-0.21148	-0.15305	-0.21722	-0.09248	-0.0206	0.1095	-0.23344	0.00879	-0.45513	-0.27716	-0.23932	-0.34707	-0.277	-0.41111	-0.10317	-0.02271
g__Enterobacter	0.11044	-0.20681	-0.2264	-0.18807	-0.26275	-0.3008	-0.25284	-0.47947	-0.35914	-0.41678	-0.45071	-0.59366	-0.47843	1	0.54321	0.09887	0.37985	0.50969	-0.06571	-0.11017	0.27849	-0.01062	0.1439	0.08699	0.25613	-0.03387	0.03084	-0.0472	0.11829	-0.08283
g__Raoultella	0.02731	-0.05424	0.07294	-0.13226	-0.14135	-0.58777	-0.34156	-0.5283	-0.59154	-0.50851	-0.37214	-0.46843	-0.21148	0.54321	1	0.00559	0.07594	0.37276	-0.33416	-0.35369	-0.1135	-0.57892	0.29134	0.18136	0.09428	0.08566	-0.12946	0.00981	0.07172	0.15397
g__Acinetobacter	-0.02001	-0.15707	0.25034	0.26722	-0.0441	0.28053	0.28066	-0.08139	-0.07521	-0.04165	-0.06379	-0.25454	-0.15305	0.09887	0.00559	1	0.63216	0.52899	0.46887	0.39381	0.43956	0.36361	0.2222	0.07109	0.27399	0.37541	0.16724	0.20901	0.21797	0.34092
g__unclassified_k__norank_d__Bacteria	0.04288	0.1227	0.24463	0.1069	0.1068	0.18795	0.1572	-0.11422	-0.11803	-0.12304	0.07059	-0.33897	-0.21722	0.37985	0.07594	0.63216	1	0.83968	0.74686	0.49257	0.75932	0.55603	0.11009	-0.18614	0.59169	0.48948	0.39	0.35129	0.29757	0.24104
g__norank_f__Mitochondria	0.2388	-0.07626	0.38475	0.24082	0.12432	0.13023	0.10952	-0.11129	-0.21333	-0.20477	0.08253	-0.28194	-0.09248	0.50969	0.37276	0.52899	0.83968	1	0.44765	0.27676	0.53787	0.33009	0.05346	-0.12696	0.48777	0.2899	0.0425	0.04879	0.19968	0.30849
g__Ralstonia	-0.04265	0.10051	0.35407	0.22535	0.20182	0.31219	0.13607	0.07999	0.08725	0.02561	0.30716	-0.0185	-0.0206	-0.06571	-0.33416	0.46887	0.74686	0.44765	1	0.78085	0.60969	0.71666	0	-0.24555	0.57472	0.43399	0.56139	0.38358	0.29252	0.28272
g__Rhodococcus	0.12491	-0.07638	0.33805	0.16544	0.06438	0.21285	0.08379	-0.07317	0.09498	-0.01922	0.21855	-0.01301	0.1095	-0.11017	-0.35369	0.39381	0.49257	0.27676	0.78085	1	0.27661	0.54406	0.04112	-0.12868	0.43168	0.27235	0.43367	0.05945	0.52719	0.31198
g__unclassified_p__Proteobacteria	-0.21559	0.09135	-0.01693	-0.00752	0.08121	0.32567	0.2752	0.02326	0.14266	0.09449	0.08455	-0.16031	-0.23344	0.27849	-0.1135	0.43956	0.75932	0.53787	0.60969	0.27661	1	0.66954	-0.1332	-0.18466	0.38877	0.17165	0.33983	0.3174	-0.05747	-0.16255
g__Neisseria	-0.0475	0.08245	0.0444	0.11252	0.20221	0.63466	0.34252	0.32112	0.30071	0.25162	0.28795	0.19185	0.00879	-0.01062	-0.57892	0.36361	0.55603	0.33009	0.71666	0.54406	0.66954	1	-0.17158	-0.2988	0.32859	0.20173	0.26532	0.1304	0.07314	-0.05669
g__Escherichia-Shigella	-0.07801	0.22397	-0.30245	-0.46786	0.06516	-0.36497	-0.24229	-0.4255	-0.4874	-0.46867	-0.56607	-0.60142	-0.45513	0.1439	0.29134	0.2222	0.11009	0.05346	0	0.04112	-0.1332	-0.17158	1	0.69047	0.39213	0.74025	0.38082	0.48139	0.27052	0.51102
g__Aerococcus	-0.187	-0.14551	-0.32011	-0.25862	0.11663	-0.2982	-0.01167	-0.18029	-0.16376	-0.24593	-0.37117	-0.3802	-0.27716	0.08699	0.18136	0.07109	-0.18614	-0.12696	-0.24555	-0.12868	-0.18466	-0.2988	0.69047	1	-0.00889	0.20715	0.14781	0.16852	-0.02329	0.5158
g__Bacteroides	0.14687	0.26424	0.03628	-0.2298	0.05808	0.04454	-0.14759	-0.28731	-0.17722	-0.24822	-0.12464	-0.32928	-0.23932	0.25613	0.09428	0.27399	0.59169	0.48777	0.57472	0.43168	0.38877	0.32859	0.39213	-0.00889	1	0.61806	0.53893	0.51185	0.37837	0.14632
g__norank_f__Muribaculaceae	-0.01913	0.37884	-0.08371	-0.36029	0.13261	-0.03702	-0.13712	-0.25453	-0.34017	-0.26669	-0.24086	-0.47383	-0.34707	-0.03387	0.08566	0.37541	0.48948	0.2899	0.43399	0.27235	0.17165	0.20173	0.74025	0.20715	0.61806	1	0.50513	0.69702	0.32167	0.43549
g__Stenotrophomonas	-0.07096	0.48213	-0.01223	-0.20757	0.02444	-0.0924	-0.10101	-0.35186	-0.0736	-0.18789	-0.34097	-0.38426	-0.277	0.03084	-0.12946	0.16724	0.39	0.0425	0.56139	0.43367	0.33983	0.26532	0.38082	0.14781	0.53893	0.50513	1	0.73639	0.34704	0.15379
g__Pseudomonas	-0.16955	0.44572	-0.2224	-0.32843	-0.06993	-0.04807	-0.22733	-0.26082	-0.19815	-0.15938	-0.29321	-0.40286	-0.41111	-0.0472	0.00981	0.20901	0.35129	0.04879	0.38358	0.05945	0.3174	0.1304	0.48139	0.16852	0.51185	0.69702	0.73639	1	0.09906	0.13136
g__Tumebacillus	0.30377	0.11552	0.13725	-0.03105	-0.04965	-0.16414	-0.0949	-0.36137	-0.1563	-0.15264	-0.18352	-0.1606	-0.10317	0.11829	0.07172	0.21797	0.29757	0.19968	0.29252	0.52719	-0.05747	0.07314	0.27052	-0.02329	0.37837	0.32167	0.34704	0.09906	1	0.29212
g__Staphylococcus	-0.02744	-0.14952	0.46918	0.35089	0.20834	-0.22611	-0.05122	-0.05698	-0.29678	-0.25926	0.02863	-0.24481	-0.02271	-0.08283	0.15397	0.34092	0.24104	0.30849	0.28272	0.31198	-0.16255	-0.05669	0.51102	0.5158	0.14632	0.43549	0.15379	0.13136	0.29212	1

## Sheet: corr (Non-infected)
Table S2(2).The correlation matrix table among the top 30 abundant bacterial genera in Non-infected group.
	g__Enterococcus	g__unclassified_f__Streptococcaceae	g__unclassified_o__Lactobacillales	g__Corynebacterium	g__Solobacterium	g__Gemella	g__Lactobacillus	g__Bifidobacterium	g__Escherichia-Shigella	g__Prevotella	g__Streptococcus	g__Actinomyces	g__Fusobacterium	g__Atopobium	g__Peptostreptococcus	g__Granulicatella	g__Veillonella	g__Rothia	g__Parvimonas	g__Olsenella	g__Alloscardovia	g__Enterobacter	g__Raoultella	g__Rhodococcus	g__Clostridium_sensu_stricto_1	g__norank_f__Muribaculaceae	g__Acinetobacter	g__Prevotellaceae_NK3B31_group	g__unclassified_k__norank_d__Bacteria	g__Rikenellaceae_RC9_gut_group
g__Enterococcus	1	0.16911	0.3156	-0.21227	-0.26083	-0.24397	-0.08778	-0.09341	-0.0374	-0.02745	-0.09008	-0.35359	-0.29613	-0.19839	-0.26454	-0.43042	-0.32386	-0.33641	-0.20003	-0.13772	-0.09314	-0.74435	-0.57878	-0.0836	-0.10127	-0.15803	-0.11609	0.33225	-0.06556	0.06016
g__unclassified_f__Streptococcaceae	0.16911	1	0.70635	-0.02366	0.24921	-0.01094	0.31159	0.59894	0.33739	0.24226	0.59256	0.40289	0.51681	0.47065	0.44333	0.38731	0.28428	0.20279	0.34707	0.39659	0.49022	-0.38226	-0.15254	-0.33584	-0.19227	-0.1775	-0.37562	-0.12138	-0.42977	-0.24614
g__unclassified_o__Lactobacillales	0.3156	0.70635	1	0.12549	0.16835	-0.1227	0.34528	0.36432	0.21434	0.43509	0.43769	0.30713	0.39486	0.56661	0.40618	0.27704	0.36015	0.32498	0.23705	0.6024	0.70158	-0.21768	-0.01418	-0.23182	-0.31535	-0.27544	-0.28299	-0.04782	-0.16236	0.04141
g__Corynebacterium	-0.21227	-0.02366	0.12549	1	0.40783	0.48757	0.19102	0.01531	0.35165	0.46835	0.45044	0.30182	0.25888	0.36769	0.3661	0.43705	0.51832	0.49474	0.09837	0.06922	0.00437	0.12204	0.14722	0.41537	0.3184	0.40616	0.47198	-0.05743	0.24594	0.29922
g__Solobacterium	-0.26083	0.24921	0.16835	0.40783	1	0.75374	0.20107	0.05598	0.17664	0.21668	0.65775	0.67728	0.71589	0.65784	0.63835	0.72648	0.48185	0.43285	0.25455	0.17157	0.22628	-0.00857	-0.19297	0.10966	0.07135	0.39885	0.31127	-0.1952	-0.24526	0.0296
g__Gemella	-0.24397	-0.01094	-0.1227	0.48757	0.75374	1	0.14392	0.03589	0.2784	0.34088	0.58218	0.65985	0.56734	0.432	0.42333	0.64658	0.50505	0.43725	0.25371	0.03586	-0.05493	0.05083	-0.16044	0.16711	0.24834	0.56832	0.5991	-0.04898	0.06011	0.24734
g__Lactobacillus	-0.08778	0.31159	0.34528	0.19102	0.20107	0.14392	1	0.77164	0.67165	0.73559	0.63873	0.39159	0.58412	0.49739	0.39018	0.54486	0.651	0.53056	0.49488	0.43617	0.55579	0.09127	0.15511	-0.09385	0.25315	0.4364	0.22923	0.139	0.07595	0.35068
g__Bifidobacterium	-0.09341	0.59894	0.36432	0.01531	0.05598	0.03589	0.77164	1	0.70583	0.58775	0.58632	0.35592	0.49717	0.33703	0.33653	0.45044	0.46849	0.39585	0.51265	0.39369	0.4871	0.02649	0.09813	-0.34001	0.14354	0.28923	0.00281	0.20801	0.02925	0.201
g__Escherichia-Shigella	-0.0374	0.33739	0.21434	0.35165	0.17664	0.2784	0.67165	0.70583	1	0.77898	0.69966	0.35451	0.5344	0.36539	0.49731	0.5832	0.60348	0.57721	0.64735	0.2943	0.29351	0.14953	0.23544	-0.06113	0.58923	0.46309	0.41781	0.29049	0.12246	0.22706
g__Prevotella	-0.02745	0.24226	0.43509	0.46835	0.21668	0.34088	0.73559	0.58775	0.77898	1	0.64573	0.46136	0.53149	0.54354	0.48972	0.59617	0.79133	0.7046	0.46099	0.44592	0.45242	0.21768	0.33066	0.09066	0.28697	0.36107	0.38579	0.23064	0.30345	0.37098
g__Streptococcus	-0.09008	0.59256	0.43769	0.45044	0.65775	0.58218	0.63873	0.58632	0.69966	0.64573	1	0.69615	0.8171	0.70413	0.75452	0.82469	0.7303	0.62899	0.60353	0.44023	0.45885	-0.07687	-0.04755	-0.00497	0.28575	0.42366	0.33311	0.01603	-0.11405	0.04278
g__Actinomyces	-0.35359	0.40289	0.30713	0.30182	0.67728	0.65985	0.39159	0.35592	0.35451	0.46136	0.69615	1	0.86662	0.80671	0.78846	0.82615	0.73607	0.72355	0.61284	0.57969	0.56935	0.22675	0.12892	-0.09195	-0.07182	0.23764	0.20736	-0.25838	-0.03158	0.0331
g__Fusobacterium	-0.29613	0.51681	0.39486	0.25888	0.71589	0.56734	0.58412	0.49717	0.5344	0.53149	0.8171	0.86662	1	0.8736	0.80113	0.86978	0.74636	0.72194	0.7136	0.54591	0.63716	0.12083	0.04432	-0.13428	0.03447	0.28995	0.11795	-0.25463	-0.30075	0.00644
g__Atopobium	-0.19839	0.47065	0.56661	0.36769	0.65784	0.432	0.49739	0.33703	0.36539	0.54354	0.70413	0.80671	0.8736	1	0.83363	0.73304	0.73342	0.74433	0.61936	0.67225	0.76085	0.12039	0.04537	-0.0789	-0.22911	0.11058	0.0392	-0.21527	-0.29927	-0.00445
g__Peptostreptococcus	-0.26454	0.44333	0.40618	0.3661	0.63835	0.42333	0.39018	0.33653	0.49731	0.48972	0.75452	0.78846	0.80113	0.83363	1	0.78108	0.68887	0.72811	0.69546	0.71047	0.68052	0.26687	0.16633	-0.1624	0.03188	0.08289	0.16578	-0.17711	-0.18062	-0.18722
g__Granulicatella	-0.43042	0.38731	0.27704	0.43705	0.72648	0.64658	0.54486	0.45044	0.5832	0.59617	0.82469	0.82615	0.86978	0.73304	0.78108	1	0.84907	0.80303	0.56232	0.50664	0.50966	0.26796	0.1734	0.01373	0.29323	0.41204	0.42399	-0.20478	0.00239	0.09612
g__Veillonella	-0.32386	0.28428	0.36015	0.51832	0.48185	0.50505	0.651	0.46849	0.60348	0.79133	0.7303	0.73607	0.74636	0.73342	0.68887	0.84907	1	0.87387	0.58814	0.58041	0.54639	0.27892	0.30064	0.0805	0.23295	0.38358	0.39276	-0.15956	0.24377	0.17314
g__Rothia	-0.33641	0.20279	0.32498	0.49474	0.43285	0.43725	0.53056	0.39585	0.57721	0.7046	0.62899	0.72355	0.72194	0.74433	0.72811	0.80303	0.87387	1	0.61587	0.62781	0.61089	0.3886	0.24588	0.0817	0.08652	0.20868	0.33001	-0.29395	0.16377	0.08456
g__Parvimonas	-0.20003	0.34707	0.23705	0.09837	0.25455	0.25371	0.49488	0.51265	0.64735	0.46099	0.60353	0.61284	0.7136	0.61936	0.69546	0.56232	0.58814	0.61587	1	0.62109	0.55758	0.2556	0.26591	-0.2337	0.12174	0.11124	0.10025	-0.06329	-0.15846	-0.14221
g__Olsenella	-0.13772	0.39659	0.6024	0.06922	0.17157	0.03586	0.43617	0.39369	0.2943	0.44592	0.44023	0.57969	0.54591	0.67225	0.71047	0.50664	0.58041	0.62781	0.62109	1	0.91281	0.32256	0.24584	-0.49014	-0.18232	-0.19632	-0.01832	-0.17456	-0.04923	0.00794
g__Alloscardovia	-0.09314	0.49022	0.70158	0.00437	0.22628	-0.05493	0.55579	0.4871	0.29351	0.45242	0.45885	0.56935	0.63716	0.76085	0.68052	0.50966	0.54639	0.61089	0.55758	0.91281	1	0.23032	0.1431	-0.45982	-0.27696	-0.13752	-0.16031	-0.15299	-0.17217	0.04904
g__Enterobacter	-0.74435	-0.38226	-0.21768	0.12204	-0.00857	0.05083	0.09127	0.02649	0.14953	0.21768	-0.07687	0.22675	0.12083	0.12039	0.26687	0.26796	0.27892	0.3886	0.2556	0.32256	0.23032	1	0.74415	0.03682	0.15101	0.05482	0.28291	-0.02033	0.34744	0.12177
g__Raoultella	-0.57878	-0.15254	-0.01418	0.14722	-0.19297	-0.16044	0.15511	0.09813	0.23544	0.33066	-0.04755	0.12892	0.04432	0.04537	0.16633	0.1734	0.30064	0.24588	0.26591	0.24584	0.1431	0.74415	1	0.16943	0.19619	-0.1216	0.05698	-0.00197	0.32106	-0.0515
g__Rhodococcus	-0.0836	-0.33584	-0.23182	0.41537	0.10966	0.16711	-0.09385	-0.34001	-0.06113	0.09066	-0.00497	-0.09195	-0.13428	-0.0789	-0.1624	0.01373	0.0805	0.0817	-0.2337	-0.49014	-0.45982	0.03682	0.16943	1	0.08816	0.12043	0.27369	-0.02715	0.2731	-0.09554
g__Clostridium_sensu_stricto_1	-0.10127	-0.19227	-0.31535	0.3184	0.07135	0.24834	0.25315	0.14354	0.58923	0.28697	0.28575	-0.07182	0.03447	-0.22911	0.03188	0.29323	0.23295	0.08652	0.12174	-0.18232	-0.27696	0.15101	0.19619	0.08816	1	0.66002	0.68305	0.32098	0.36678	0.35977
g__norank_f__Muribaculaceae	-0.15803	-0.1775	-0.27544	0.40616	0.39885	0.56832	0.4364	0.28923	0.46309	0.36107	0.42366	0.23764	0.28995	0.11058	0.08289	0.41204	0.38358	0.20868	0.11124	-0.19632	-0.13752	0.05482	-0.1216	0.12043	0.66002	1	0.72621	0.42715	0.36173	0.64314
g__Acinetobacter	-0.11609	-0.37562	-0.28299	0.47198	0.31127	0.5991	0.22923	0.00281	0.41781	0.38579	0.33311	0.20736	0.11795	0.0392	0.16578	0.42399	0.39276	0.33001	0.10025	-0.01832	-0.16031	0.28291	0.05698	0.27369	0.68305	0.72621	1	0.41609	0.54058	0.54084
g__Prevotellaceae_NK3B31_group	0.33225	-0.12138	-0.04782	-0.05743	-0.1952	-0.04898	0.139	0.20801	0.29049	0.23064	0.01603	-0.25838	-0.25463	-0.21527	-0.17711	-0.20478	-0.15956	-0.29395	-0.06329	-0.17456	-0.15299	-0.02033	-0.00197	-0.02715	0.32098	0.42715	0.41609	1	0.31793	0.45744
g__unclassified_k__norank_d__Bacteria	-0.06556	-0.42977	-0.16236	0.24594	-0.24526	0.06011	0.07595	0.02925	0.12246	0.30345	-0.11405	-0.03158	-0.30075	-0.29927	-0.18062	0.00239	0.24377	0.16377	-0.15846	-0.04923	-0.17217	0.34744	0.32106	0.2731	0.36678	0.36173	0.54058	0.31793	1	0.46092
g__Rikenellaceae_RC9_gut_group	0.06016	-0.24614	0.04141	0.29922	0.0296	0.24734	0.35068	0.201	0.22706	0.37098	0.04278	0.0331	0.00644	-0.00445	-0.18722	0.09612	0.17314	0.08456	-0.14221	0.00794	0.04904	0.12177	-0.0515	-0.09554	0.35977	0.64314	0.54084	0.45744	0.46092	1

## Sheet: pvalue (Cs-infected)
Table S2(3).The P value corresponding to the correlation matrix in Cs-infected group.
	g__Enterococcus	g__Clostridium_sensu_stricto_1	g__Psychrobacter	g__Actinobacillus	g__Rothia	g__Actinomyces	g__Veillonella	g__Granulicatella	g__Fusobacterium	g__Gemella	g__Streptococcus	g__Atopobium	g__Peptostreptococcus	g__Enterobacter	g__Raoultella	g__Acinetobacter	g__unclassified_k__norank_d__Bacteria	g__norank_f__Mitochondria	g__Ralstonia	g__Rhodococcus	g__unclassified_p__Proteobacteria	g__Neisseria	g__Escherichia-Shigella	g__Aerococcus	g__Bacteroides	g__norank_f__Muribaculaceae	g__Stenotrophomonas	g__Pseudomonas	g__Tumebacillus	g__Staphylococcus
g__Enterococcus	1.08802e-173	0.550131	0.479756	0.796154	0.139094	0.0960529	0.297549	0.613398	0.197989	0.295392	0.300732	0.393076	0.0576059	0.607425	0.899192	0.926064	0.842292	0.2611	0.84315	0.560854	0.311666	0.82554	0.717105	0.381602	0.49346	0.929298	0.741796	0.428329	0.149001	0.89874
g__Clostridium_sensu_stricto_1	0.550131	0	0.713403	0.106509	0.0337774	0.581031	0.201543	0.586472	0.617011	0.459436	0.987718	0.573224	0.280544	0.332248	0.801249	0.463572	0.567888	0.723226	0.640275	0.722782	0.671202	0.701719	0.292759	0.497511	0.212134	0.0679157	0.0170391	0.0290419	0.5909	0.485594
g__Psychrobacter	0.479756	0.713403	0	3.79906e-07	0.606283	0.957161	0.716573	0.513803	0.980715	0.869965	0.0833989	0.293856	0.0334667	0.287412	0.734841	0.238059	0.249295	0.0633851	0.0896045	0.106165	0.937413	0.836776	0.150861	0.127269	0.866345	0.697366	0.954754	0.296244	0.522478	0.0207272
g__Actinobacillus	0.796154	0.106509	3.79906e-07	0	0.885595	0.559338	0.552071	0.084605	0.387514	0.267691	0.0762319	0.0841941	0.0751565	0.378818	0.537863	0.206834	0.619056	0.256968	0.289725	0.43977	0.972168	0.600628	0.0211378	0.222376	0.280044	0.083725	0.330438	0.117139	0.885487	0.0927272
g__Rothia	0.139094	0.0337774	0.606283	0.885595	0	0.0175078	0.000322637	0.00379333	0.0666821	0.0961862	0.00661968	0.0238697	0.00494459	0.214818	0.510013	0.837859	0.619407	0.562721	0.344287	0.765044	0.706009	0.343344	0.762257	0.587324	0.787506	0.536767	0.90974	0.745413	0.817786	0.328591
g__Actinomyces	0.0960529	0.581031	0.957161	0.559338	0.0175078	0	6.96273e-05	0.000180239	0.000135339	0.000276633	0.00215033	0.00183479	0.0102237	0.153209	0.00252503	0.184243	0.379147	0.544152	0.137491	0.318001	0.120432	0.000864685	0.0794973	0.156968	0.836264	0.863653	0.66761	0.8235	0.443418	0.288039
g__Veillonella	0.297549	0.201543	0.716573	0.552071	0.000322637	6.96273e-05	0	0.000155554	9.7002e-05	0.000195912	0.00397543	0.00579878	0.00135716	0.233259	0.102357	0.184028	0.463207	0.610434	0.526105	0.697092	0.193073	0.101339	0.253991	0.956857	0.491321	0.522868	0.638601	0.28538	0.659155	0.812137
g__Granulicatella	0.613398	0.586472	0.513803	0.084605	0.00379333	0.000180239	0.000155554	0	1.88583e-05	9.90564e-07	1.10731e-05	1.18781e-06	0.000155684	0.0177506	0.00796019	0.705387	0.595104	0.604654	0.71024	0.734036	0.914082	0.126004	0.0381796	0.399202	0.173419	0.230045	0.0917724	0.218331	0.0827383	0.791437
g__Fusobacterium	0.197989	0.617011	0.980715	0.387514	0.0666821	0.000135339	9.7002e-05	1.88583e-05	0	3.3009e-12	0.00332012	0.000597742	0.000483421	0.0847904	0.00233006	0.726871	0.582822	0.316887	0.685205	0.65886	0.506067	0.153336	0.0157018	0.444488	0.407435	0.103857	0.732502	0.353313	0.465799	0.159051
g__Gemella	0.295392	0.459436	0.869965	0.267691	0.0961862	0.000276633	0.000195912	9.90564e-07	3.3009e-12	0	0.00215951	0.000217396	0.000259113	0.0427592	0.0111708	0.846775	0.566801	0.337145	0.905451	0.928974	0.660539	0.235588	0.0208844	0.246716	0.242187	0.207769	0.379298	0.45695	0.476427	0.221188
g__Streptococcus	0.300732	0.987718	0.0833989	0.0762319	0.00661968	0.00215033	0.00397543	1.10731e-05	0.00332012	0.00215951	0	1.79154e-05	3.63137e-05	0.0270828	0.0733345	0.767125	0.743082	0.701442	0.144293	0.304907	0.694468	0.17243	0.00393385	0.0741512	0.561731	0.256897	0.102987	0.16437	0.390681	0.894353
g__Atopobium	0.393076	0.573224	0.293856	0.0841941	0.0238697	0.00183479	0.00579878	1.18781e-06	0.000597742	0.000217396	1.79154e-05	1.08802e-173	3.3899e-06	0.00222648	0.0209588	0.230025	0.105154	0.181964	0.931608	0.951882	0.454276	0.369135	0.00187956	0.0668482	0.11613	0.0193359	0.0637553	0.0509551	0.453461	0.24893
g__Peptostreptococcus	0.0576059	0.280544	0.0334667	0.0751565	0.00494459	0.0102237	0.00135716	0.000155684	0.000483421	0.000259113	3.63137e-05	3.3899e-06	0	0.0180339	0.321194	0.475223	0.307918	0.667357	0.923873	0.610525	0.272289	0.967471	0.0254342	0.189797	0.260044	0.09659	0.190066	0.0459627	0.631407	0.916103
g__Enterobacter	0.607425	0.332248	0.287412	0.378818	0.214818	0.153209	0.233259	0.0177506	0.0847904	0.0427592	0.0270828	0.00222648	0.0180339	0	0.00608467	0.645787	0.0671237	0.0109522	0.760325	0.608328	0.187591	0.960731	0.50234	0.686074	0.227012	0.875164	0.886242	0.826631	0.581985	0.700415
g__Raoultella	0.899192	0.801249	0.734841	0.537863	0.510013	0.00252503	0.102357	0.00796019	0.00233006	0.0111708	0.0733345	0.0209588	0.321194	0.00608467	0	0.979334	0.724334	0.0728182	0.11051	0.0899761	0.597467	0.00303657	0.167205	0.396371	0.661252	0.690637	0.546569	0.963716	0.739098	0.472563
g__Acinetobacter	0.926064	0.463572	0.238059	0.206834	0.837859	0.184243	0.184028	0.705387	0.726871	0.846775	0.767125	0.230025	0.475223	0.645787	0.979334	1.08802e-173	0.000919361	0.00786416	0.0208229	0.0569026	0.0316191	0.080708	0.296697	0.741312	0.195116	0.0706461	0.434736	0.327012	0.306204	0.103043
g__unclassified_k__norank_d__Bacteria	0.842292	0.567888	0.249295	0.619056	0.619407	0.379147	0.463207	0.595104	0.582822	0.566801	0.743082	0.105154	0.307918	0.0671237	0.724334	0.000919361	0	2.89281e-07	2.7605e-05	0.0144723	1.68877e-05	0.004783	0.608576	0.383835	0.00232273	0.0151962	0.0595675	0.092335	0.15789	0.256531
g__norank_f__Mitochondria	0.2611	0.723226	0.0633851	0.256968	0.562721	0.544152	0.610434	0.604654	0.316887	0.337145	0.701442	0.181964	0.667357	0.0109522	0.0728182	0.00786416	2.89281e-07	0	0.0282725	0.190457	0.00670917	0.115181	0.804043	0.55442	0.0156109	0.169399	0.843704	0.820897	0.349542	0.142474
g__Ralstonia	0.84315	0.640275	0.0896045	0.289725	0.344287	0.137491	0.526105	0.71024	0.685205	0.905451	0.144293	0.931608	0.923873	0.760325	0.11051	0.0208229	2.7605e-05	0.0282725	0	6.7198e-06	0.00156165	8.15857e-05	1	0.247453	0.00330886	0.0340991	0.0043124	0.0642668	0.165402	0.180706
g__Rhodococcus	0.560854	0.722782	0.106165	0.43977	0.765044	0.318001	0.697092	0.734036	0.65886	0.928974	0.304907	0.951882	0.610525	0.608328	0.0899761	0.0569026	0.0144723	0.190457	6.7198e-06	0	0.190718	0.0059906	0.848697	0.549014	0.0351722	0.19791	0.0342478	0.78258	0.00811677	0.13777
g__unclassified_p__Proteobacteria	0.311666	0.671202	0.937413	0.972168	0.706009	0.120432	0.193073	0.914082	0.506067	0.660539	0.694468	0.454276	0.272289	0.187591	0.597467	0.0316191	1.68877e-05	0.00670917	0.00156165	0.190718	0	0.000345765	0.534924	0.38769	0.0604462	0.422542	0.104227	0.130702	0.789657	0.447913
g__Neisseria	0.82554	0.701719	0.836776	0.600628	0.343344	0.000864685	0.101339	0.126004	0.153336	0.235588	0.17243	0.369135	0.967471	0.960731	0.00303657	0.080708	0.004783	0.115181	8.15857e-05	0.0059906	0.000345765	0	0.422734	0.156106	0.116946	0.344506	0.210199	0.543641	0.734125	0.792464
g__Escherichia-Shigella	0.717105	0.292759	0.150861	0.0211378	0.762257	0.0794973	0.253991	0.0381796	0.0157018	0.0208844	0.00393385	0.00187956	0.0254342	0.50234	0.167205	0.296697	0.608576	0.804043	1	0.848697	0.534924	0.422734	0	0.00018808	0.0580659	3.543e-05	0.066369	0.0172342	0.201066	0.0107123
g__Aerococcus	0.381602	0.497511	0.127269	0.222376	0.587324	0.156968	0.956857	0.399202	0.444488	0.246716	0.0741512	0.0668482	0.189797	0.686074	0.396371	0.741312	0.383835	0.55442	0.247453	0.549014	0.38769	0.156106	0.00018808	0	0.967111	0.331424	0.490651	0.431192	0.913994	0.00988246
g__Bacteroides	0.49346	0.212134	0.866345	0.280044	0.787506	0.836264	0.491321	0.173419	0.407435	0.242187	0.561731	0.11613	0.260044	0.227012	0.661252	0.195116	0.00232273	0.0156109	0.00330886	0.0351722	0.0604462	0.116946	0.0580659	0.967111	0	0.00128812	0.00658093	0.0105642	0.06828	0.495082
g__norank_f__Muribaculaceae	0.929298	0.0679157	0.697366	0.083725	0.536767	0.863653	0.522868	0.230045	0.103857	0.207769	0.256897	0.0193359	0.09659	0.875164	0.690637	0.0706461	0.0151962	0.169399	0.0340991	0.19791	0.422542	0.344506	3.543e-05	0.331424	0.00128812	0	0.0118132	0.000153875	0.125326	0.0334159
g__Stenotrophomonas	0.741796	0.0170391	0.954754	0.330438	0.90974	0.66761	0.638601	0.0917724	0.732502	0.379298	0.102987	0.0637553	0.190066	0.886242	0.546569	0.434736	0.0595675	0.843704	0.0043124	0.0342478	0.104227	0.210199	0.066369	0.490651	0.00658093	0.0118132	1.08802e-173	4.08494e-05	0.0966203	0.47307
g__Pseudomonas	0.428329	0.0290419	0.296244	0.117139	0.745413	0.8235	0.28538	0.218331	0.353313	0.45695	0.16437	0.0509551	0.0459627	0.826631	0.963716	0.327012	0.092335	0.820897	0.0642668	0.78258	0.130702	0.543641	0.0172342	0.431192	0.0105642	0.000153875	4.08494e-05	0	0.645131	0.54064
g__Tumebacillus	0.149001	0.5909	0.522478	0.885487	0.817786	0.443418	0.659155	0.0827383	0.465799	0.476427	0.390681	0.453461	0.631407	0.581985	0.739098	0.306204	0.15789	0.349542	0.165402	0.00811677	0.789657	0.734125	0.201066	0.913994	0.06828	0.125326	0.0966203	0.645131	0	0.166011
g__Staphylococcus	0.89874	0.485594	0.0207272	0.0927272	0.328591	0.288039	0.812137	0.791437	0.159051	0.221188	0.894353	0.24893	0.916103	0.700415	0.472563	0.103043	0.256531	0.142474	0.180706	0.13777	0.447913	0.792464	0.0107123	0.00988246	0.495082	0.0334159	0.47307	0.54064	0.166011	0

## Sheet: pvalue (Non-infected)
Table S2(4).The P value corresponding to the correlation matrix in Non-infected group.
	g__Enterococcus	g__unclassified_f__Streptococcaceae	g__unclassified_o__Lactobacillales	g__Corynebacterium	g__Solobacterium	g__Gemella	g__Lactobacillus	g__Bifidobacterium	g__Escherichia-Shigella	g__Prevotella	g__Streptococcus	g__Actinomyces	g__Fusobacterium	g__Atopobium	g__Peptostreptococcus	g__Granulicatella	g__Veillonella	g__Rothia	g__Parvimonas	g__Olsenella	g__Alloscardovia	g__Enterobacter	g__Raoultella	g__Rhodococcus	g__Clostridium_sensu_stricto_1	g__norank_f__Muribaculaceae	g__Acinetobacter	g__Prevotellaceae_NK3B31_group	g__unclassified_k__norank_d__Bacteria	g__Rikenellaceae_RC9_gut_group
g__Enterococcus	0	0.408893	0.116289	0.297836	0.198095	0.229728	0.66983	0.649914	0.85608	0.894114	0.661647	0.0763863	0.141862	0.331284	0.191559	0.0281696	0.106533	0.0928882	0.32722	0.502287	0.650878	1.30086e-05	0.00195036	0.684707	0.622546	0.440694	0.572257	0.0972558	0.750325	0.770343
g__unclassified_f__Streptococcaceae	0.408893	0	5.51552e-05	0.908675	0.21956	0.957697	0.12126	0.00122538	0.0918798	0.233106	0.00142418	0.04128	0.00686437	0.0152402	0.0233042	0.0506004	0.159282	0.320432	0.0823606	0.0448708	0.0110108	0.0539514	0.456938	0.093478	0.346699	0.385665	0.0586259	0.554734	0.0284331	0.225476
g__unclassified_o__Lactobacillales	0.116289	5.51552e-05	0	0.541326	0.411019	0.550408	0.0840645	0.0672864	0.293043	0.0263241	0.0253392	0.126954	0.0458966	0.00254567	0.0394937	0.170645	0.0707123	0.105254	0.243625	0.00112783	6.50814e-05	0.285411	0.945177	0.254485	0.116596	0.173221	0.161266	0.816546	0.428117	0.840821
g__Corynebacterium	0.297836	0.908675	0.541326	0	0.0386263	0.0115176	0.349917	0.940821	0.0781261	0.0158156	0.0209305	0.133998	0.201597	0.0646029	0.0658603	0.0255783	0.00667526	0.0101862	0.632603	0.736888	0.983079	0.552562	0.472951	0.0348376	0.112905	0.0395066	0.0149159	0.780501	0.225857	0.137549
g__Solobacterium	0.198095	0.21956	0.411019	0.0386263	2.31523e-189	8.75731e-06	0.324641	0.785906	0.388018	0.287687	0.000260512	0.000144456	3.9215e-05	0.000259777	0.000449663	2.64196e-05	0.0126812	0.0271972	0.209506	0.402008	0.266319	0.966865	0.344934	0.593838	0.729055	0.0435519	0.121662	0.339275	0.227199	0.88585
g__Gemella	0.229728	0.957697	0.550408	0.0115176	8.75731e-06	0	0.483047	0.861835	0.168467	0.0883551	0.00180708	0.000245	0.00250609	0.0275341	0.0311695	0.000358282	0.00849836	0.0255024	0.211071	0.861951	0.789858	0.805235	0.433656	0.414524	0.221225	0.00245342	0.00122077	0.812202	0.770538	0.223145
g__Lactobacillus	0.66983	0.12126	0.0840645	0.349917	0.324641	0.483047	2.31523e-189	3.91771e-06	0.000171962	1.8538e-05	0.000445044	0.047892	0.00172927	0.00972864	0.0487714	0.00399903	0.000316325	0.0052976	0.0101628	0.0259109	0.00319917	0.65746	0.449293	0.648384	0.212117	0.0258223	0.259981	0.49827	0.712314	0.079016
g__Bifidobacterium	0.649914	0.00122538	0.0672864	0.940821	0.785906	0.861835	3.91771e-06	2.31523e-189	5.61645e-05	0.00159198	0.00164478	0.0743314	0.00976555	0.092249	0.0927554	0.0209311	0.0157811	0.0453079	0.00740926	0.0466052	0.0116108	0.897793	0.633413	0.0892254	0.484198	0.151832	0.989128	0.307874	0.88721	0.324835
g__Escherichia-Shigella	0.85608	0.0918798	0.293043	0.0781261	0.388018	0.168467	0.000171962	5.61645e-05	0	2.75963e-06	6.95169e-05	0.0755718	0.00491772	0.066425	0.00974166	0.00176561	0.00109894	0.00201962	0.00035072	0.144463	0.145588	0.465952	0.246926	0.766726	0.00153858	0.0171986	0.0336807	0.14997	0.551192	0.264643
g__Prevotella	0.894114	0.233106	0.0263241	0.0158156	0.287687	0.0883551	1.8538e-05	0.00159198	2.75963e-06	0	0.000366913	0.0176741	0.00520332	0.00410644	0.0111041	0.00130855	1.48251e-06	5.86277e-05	0.0177766	0.0224164	0.0203088	0.285407	0.0989591	0.659621	0.155194	0.0699449	0.0515961	0.256988	0.13181	0.0620677
g__Streptococcus	0.661647	0.00142418	0.0253392	0.0209305	0.000260512	0.00180708	0.000445044	0.00164478	6.95169e-05	0.000366913	0	7.83106e-05	3.51793e-07	5.95934e-05	8.46897e-06	2.20489e-07	2.28166e-05	0.000577545	0.00109763	0.0244067	0.0183848	0.70897	0.817557	0.980773	0.157041	0.031026	0.0963377	0.93803	0.579061	0.835621
g__Actinomyces	0.0763863	0.04128	0.126954	0.133998	0.000144456	0.000245	0.047892	0.0743314	0.0755718	0.0176741	7.83106e-05	2.31523e-189	1.04169e-08	6.4445e-07	1.71925e-06	2.01077e-07	1.81895e-05	2.95215e-05	0.000873409	0.00191075	0.00239933	0.265316	0.530231	0.655065	0.727361	0.242411	0.309411	0.202498	0.878289	0.872487
g__Fusobacterium	0.141862	0.00686437	0.0458966	0.201597	3.9215e-05	0.00250609	0.00172927	0.00976555	0.00491772	0.00520332	3.51793e-07	1.04169e-08	0	5.67627e-09	8.79118e-07	7.95048e-09	1.19726e-05	3.13601e-05	4.26076e-05	0.00391598	0.000464439	0.556555	0.829785	0.513115	0.867224	0.150772	0.566062	0.209365	0.135462	0.975106
g__Atopobium	0.331284	0.0152402	0.00254567	0.0646029	0.000259777	0.0275341	0.00972864	0.092249	0.066425	0.00410644	5.95934e-05	6.4445e-07	5.67627e-09	0	1.23556e-07	2.05001e-05	2.01987e-05	1.30219e-05	0.000741159	0.000168837	6.41534e-06	0.55799	0.825819	0.701639	0.260226	0.590749	0.84921	0.290913	0.137493	0.98278
g__Peptostreptococcus	0.191559	0.0233042	0.0394937	0.0658603	0.000449663	0.0311695	0.0487714	0.0927554	0.00974166	0.0111041	8.46897e-06	1.71925e-06	8.79118e-07	1.23556e-07	0	2.49002e-06	9.97107e-05	2.48231e-05	8.01492e-05	4.76844e-05	0.000130436	0.18753	0.416736	0.427976	0.877133	0.68728	0.418316	0.386738	0.377244	0.359757
g__Granulicatella	0.0281696	0.0506004	0.170645	0.0255783	2.64196e-05	0.000358282	0.00399903	0.0209311	0.00176561	0.00130855	2.20489e-07	2.01077e-07	7.95048e-09	2.05001e-05	2.49002e-06	0	4.17725e-08	7.91696e-07	0.00278924	0.00825968	0.00782313	0.185672	0.396913	0.946943	0.145991	0.0364718	0.0308783	0.315626	0.990764	0.640415
g__Veillonella	0.106533	0.159282	0.0707123	0.00667526	0.0126812	0.00849836	0.000316325	0.0157811	0.00109894	1.48251e-06	2.28166e-05	1.81895e-05	1.19726e-05	2.01987e-05	9.97107e-05	4.17725e-08	0	5.53805e-09	0.00157764	0.00188051	0.00387813	0.167638	0.135606	0.69586	0.252109	0.0530634	0.0471676	0.43623	0.230106	0.397642
g__Rothia	0.0928882	0.320432	0.105254	0.0101862	0.0271972	0.0255024	0.0052976	0.0453079	0.00201962	5.86277e-05	0.000577545	2.95215e-05	3.13601e-05	1.30219e-05	2.48231e-05	7.91696e-07	5.53805e-09	0	0.000809527	0.000595691	0.000916722	0.0497736	0.225975	0.691548	0.674296	0.30629	0.0996634	0.144962	0.424045	0.681305
g__Parvimonas	0.32722	0.0823606	0.243625	0.632603	0.209506	0.211071	0.0101628	0.00740926	0.00035072	0.0177766	0.00109763	0.000873409	4.26076e-05	0.000741159	8.01492e-05	0.00278924	0.00157764	0.000809527	0	0.000709106	0.00308193	0.207579	0.189184	0.250533	0.553562	0.588492	0.626056	0.758722	0.439428	0.48832
g__Olsenella	0.502287	0.0448708	0.00112783	0.736888	0.402008	0.861951	0.0259109	0.0466052	0.144463	0.0224164	0.0244067	0.00191075	0.00391598	0.000168837	4.76844e-05	0.00825968	0.00188051	0.000595691	0.000709106	9.48319e-186	8.1207e-11	0.108027	0.226058	0.0110261	0.372708	0.336459	0.929202	0.39372	0.811241	0.969284
g__Alloscardovia	0.650878	0.0110108	6.50814e-05	0.983079	0.266319	0.789858	0.00319917	0.0116108	0.145588	0.0203088	0.0183848	0.00239933	0.000464439	6.41534e-06	0.000130436	0.00782313	0.00387813	0.000916722	0.00308193	8.1207e-11	0	0.257666	0.485574	0.0181066	0.170768	0.502897	0.434026	0.455585	0.40033	0.811952
g__Enterobacter	1.30086e-05	0.0539514	0.285411	0.552562	0.966865	0.805235	0.65746	0.897793	0.465952	0.285407	0.70897	0.265316	0.556555	0.55799	0.18753	0.185672	0.167638	0.0497736	0.207579	0.108027	0.257666	0	1.31198e-05	0.858268	0.46149	0.790273	0.161389	0.921458	0.0820111	0.553473
g__Raoultella	0.00195036	0.456938	0.945177	0.472951	0.344934	0.433656	0.449293	0.633413	0.246926	0.0989591	0.817557	0.530231	0.829785	0.825819	0.416736	0.396913	0.135606	0.225975	0.189184	0.226058	0.485574	1.31198e-05	0	0.407993	0.336765	0.554032	0.782168	0.99236	0.109768	0.802688
g__Rhodococcus	0.684707	0.093478	0.254485	0.0348376	0.593838	0.414524	0.648384	0.0892254	0.766726	0.659621	0.980773	0.655065	0.513115	0.701639	0.427976	0.946943	0.69586	0.691548	0.250533	0.0110261	0.0181066	0.858268	0.407993	0	0.668455	0.557857	0.176088	0.895276	0.177046	0.642459
g__Clostridium_sensu_stricto_1	0.622546	0.346699	0.116596	0.112905	0.729055	0.221225	0.212117	0.484198	0.00153858	0.155194	0.157041	0.727361	0.867224	0.260226	0.877133	0.145991	0.252109	0.674296	0.553562	0.372708	0.170768	0.46149	0.336765	0.668455	0	0.00024379	0.000120363	0.109863	0.0653174	0.0710368
g__norank_f__Muribaculaceae	0.440694	0.385665	0.173221	0.0395066	0.0435519	0.00245342	0.0258223	0.151832	0.0171986	0.0699449	0.031026	0.242411	0.150772	0.590749	0.68728	0.0364718	0.0530634	0.30629	0.588492	0.336459	0.502897	0.790273	0.554032	0.557857	0.00024379	0	2.66957e-05	0.0295237	0.0694019	0.000394277
g__Acinetobacter	0.572257	0.0586259	0.161266	0.0149159	0.121662	0.00122077	0.259981	0.989128	0.0336807	0.0515961	0.0963377	0.309411	0.566062	0.84921	0.418316	0.0308783	0.0471676	0.0996634	0.626056	0.929202	0.434026	0.161389	0.782168	0.176088	0.000120363	2.66957e-05	0	0.0344933	0.00435628	0.00433367
g__Prevotellaceae_NK3B31_group	0.0972558	0.554734	0.816546	0.780501	0.339275	0.812202	0.49827	0.307874	0.14997	0.256988	0.93803	0.202498	0.209365	0.290913	0.386738	0.315626	0.43623	0.144962	0.758722	0.39372	0.455585	0.921458	0.99236	0.895276	0.109863	0.0295237	0.0344933	9.48319e-186	0.11347	0.0187923
g__unclassified_k__norank_d__Bacteria	0.750325	0.0284331	0.428117	0.225857	0.227199	0.770538	0.712314	0.88721	0.551192	0.13181	0.579061	0.878289	0.135462	0.137493	0.377244	0.990764	0.230106	0.424045	0.439428	0.811241	0.40033	0.0820111	0.109768	0.177046	0.0653174	0.0694019	0.00435628	0.11347	0	0.0177956
g__Rikenellaceae_RC9_gut_group	0.770343	0.225476	0.840821	0.137549	0.88585	0.223145	0.079016	0.324835	0.264643	0.0620677	0.835621	0.872487	0.975106	0.98278	0.359757	0.640415	0.397642	0.681305	0.48832	0.969284	0.811952	0.553473	0.802688	0.642459	0.0710368	0.000394277	0.00433367	0.0187923	0.0177956	9.48319e-186

## Sheet: coefficient (Cs-infected)
Table S2(5).The table of correlation network edge attribute in Cs-infected group.
Node1_Name	Node2_Name	Coefficient
g__Neisseria	g__unclassified_p__Proteobacteria	0.66954
g__Neisseria	g__Actinomyces	0.634657
g__Neisseria	g__unclassified_k__norank_d__Bacteria	0.556027
g__Neisseria	g__Ralstonia	0.716658
g__Neisseria	g__Rhodococcus	0.544058
g__Neisseria	g__Raoultella	-0.578919
g__unclassified_p__Proteobacteria	g__norank_f__Mitochondria	0.537867
g__unclassified_p__Proteobacteria	g__Ralstonia	0.609694
g__unclassified_p__Proteobacteria	g__unclassified_k__norank_d__Bacteria	0.759318
g__Actinomyces	g__Veillonella	0.721327
g__Actinomyces	g__Granulicatella	0.691874
g__Actinomyces	g__Atopobium	0.60251
g__Actinomyces	g__Peptostreptococcus	0.513793
g__Actinomyces	g__Fusobacterium	0.701118
g__Actinomyces	g__Gemella	0.677401
g__Actinomyces	g__Streptococcus	0.59527
g__Actinomyces	g__Raoultella	-0.587765
g__Veillonella	g__Granulicatella	0.696668
g__Veillonella	g__Atopobium	0.545815
g__Veillonella	g__Peptostreptococcus	0.615813
g__Veillonella	g__Fusobacterium	0.711454
g__Veillonella	g__Rothia	0.672004
g__Veillonella	g__Gemella	0.689119
g__Veillonella	g__Streptococcus	0.565541
g__Granulicatella	g__Atopobium	0.815745
g__Granulicatella	g__Peptostreptococcus	0.696641
g__Granulicatella	g__Fusobacterium	0.756582
g__Granulicatella	g__Rothia	0.56791
g__Granulicatella	g__Gemella	0.819031
g__Granulicatella	g__Streptococcus	0.769463
g__Granulicatella	g__Raoultella	-0.528302
g__norank_f__Muribaculaceae	g__Bacteroides	0.618057
g__norank_f__Muribaculaceae	g__Stenotrophomonas	0.505126
g__norank_f__Muribaculaceae	g__Pseudomonas	0.697018
g__norank_f__Muribaculaceae	g__Escherichia-Shigella	0.740249
g__Escherichia-Shigella	g__Aerococcus	0.69047
g__Escherichia-Shigella	g__Atopobium	-0.601421
g__Escherichia-Shigella	g__Staphylococcus	0.511017
g__Escherichia-Shigella	g__Streptococcus	-0.566074
g__Bacteroides	g__unclassified_k__norank_d__Bacteria	0.591689
g__Bacteroides	g__Ralstonia	0.574715
g__Bacteroides	g__Stenotrophomonas	0.53893
g__Bacteroides	g__Pseudomonas	0.511848
g__unclassified_k__norank_d__Bacteria	g__Ralstonia	0.746859
g__unclassified_k__norank_d__Bacteria	g__Acinetobacter	0.632164
g__unclassified_k__norank_d__Bacteria	g__norank_f__Mitochondria	0.839684
g__Atopobium	g__Peptostreptococcus	0.795437
g__Atopobium	g__Fusobacterium	0.649232
g__Atopobium	g__Enterobacter	-0.59366
g__Atopobium	g__Gemella	0.68564
g__Atopobium	g__Streptococcus	0.757858
g__Stenotrophomonas	g__Ralstonia	0.56139
g__Stenotrophomonas	g__Pseudomonas	0.73639
g__Peptostreptococcus	g__Fusobacterium	0.657285
g__Peptostreptococcus	g__Rothia	0.554287
g__Peptostreptococcus	g__Gemella	0.679664
g__Peptostreptococcus	g__Streptococcus	0.739586
g__Ralstonia	g__Rhodococcus	0.780849
g__Rhodococcus	g__Tumebacillus	0.527194
g__Fusobacterium	g__Gemella	0.945606
g__Fusobacterium	g__Streptococcus	0.574548
g__Fusobacterium	g__Raoultella	-0.591542
g__Aerococcus	g__Staphylococcus	0.515798
g__Rothia	g__Streptococcus	0.538607
g__Acinetobacter	g__norank_f__Mitochondria	0.52899
g__Enterobacter	g__Raoultella	0.543213
g__Enterobacter	g__norank_f__Mitochondria	0.509692
g__Gemella	g__Streptococcus	0.595074
g__Gemella	g__Raoultella	-0.508505
g__Actinobacillus	g__Psychrobacter	0.835343

## Sheet: coefficient (Non-infected)
Table S2(6).The table of correlation network edge attribute in Non-infected group.
Node1_Name	Node2_Name	Coefficient
g__Actinomyces	g__Olsenella	0.579694
g__Actinomyces	g__Veillonella	0.736073
g__Actinomyces	g__unclassified_f__Streptococcaceae	0.402887
g__Actinomyces	g__Lactobacillus	0.391587
g__Actinomyces	g__Granulicatella	0.826148
g__Actinomyces	g__Prevotella	0.46136
g__Actinomyces	g__Atopobium	0.80671
g__Actinomyces	g__Peptostreptococcus	0.788459
g__Actinomyces	g__Fusobacterium	0.866623
g__Actinomyces	g__Parvimonas	0.61284
g__Actinomyces	g__Solobacterium	0.677281
g__Actinomyces	g__Rothia	0.723553
g__Actinomyces	g__Gemella	0.659848
g__Actinomyces	g__Alloscardovia	0.569353
g__Actinomyces	g__Streptococcus	0.696146
g__Olsenella	g__Veillonella	0.580406
g__Olsenella	g__unclassified_f__Streptococcaceae	0.396587
g__Olsenella	g__Lactobacillus	0.436168
g__Olsenella	g__Granulicatella	0.506645
g__Olsenella	g__Prevotella	0.44592
g__Olsenella	g__Atopobium	0.67225
g__Olsenella	g__Peptostreptococcus	0.710466
g__Olsenella	g__Rhodococcus	-0.490137
g__Olsenella	g__Fusobacterium	0.545907
g__Olsenella	g__Parvimonas	0.621087
g__Olsenella	g__Rothia	0.627812
g__Olsenella	g__Alloscardovia	0.912805
g__Olsenella	g__Bifidobacterium	0.393685
g__Olsenella	g__Streptococcus	0.440226
g__Olsenella	g__unclassified_o__Lactobacillales	0.602404
g__Veillonella	g__Escherichia-Shigella	0.60348
g__Veillonella	g__Lactobacillus	0.651001
g__Veillonella	g__Granulicatella	0.849069
g__Veillonella	g__Prevotella	0.791334
g__Veillonella	g__Atopobium	0.733421
g__Veillonella	g__Peptostreptococcus	0.688865
g__Veillonella	g__Fusobacterium	0.746357
g__Veillonella	g__Parvimonas	0.588139
g__Veillonella	g__Solobacterium	0.481852
g__Veillonella	g__Rothia	0.873874
g__Veillonella	g__Acinetobacter	0.392763
g__Veillonella	g__Gemella	0.505052
g__Veillonella	g__Alloscardovia	0.546388
g__Veillonella	g__Bifidobacterium	0.468489
g__Veillonella	g__Streptococcus	0.730298
g__Veillonella	g__Corynebacterium	0.518324
g__Escherichia-Shigella	g__Lactobacillus	0.671653
g__Escherichia-Shigella	g__Granulicatella	0.583204
g__Escherichia-Shigella	g__Prevotella	0.778975
g__Escherichia-Shigella	g__norank_f__Muribaculaceae	0.46309
g__Escherichia-Shigella	g__Peptostreptococcus	0.497312
g__Escherichia-Shigella	g__Fusobacterium	0.534405
g__Escherichia-Shigella	g__Parvimonas	0.647346
g__Escherichia-Shigella	g__Rothia	0.577208
g__Escherichia-Shigella	g__Acinetobacter	0.417807
g__Escherichia-Shigella	g__Bifidobacterium	0.705832
g__Escherichia-Shigella	g__Streptococcus	0.69966
g__Escherichia-Shigella	g__Clostridium_sensu_stricto_1	0.589228
g__unclassified_f__Streptococcaceae	g__unclassified_k__norank_d__Bacteria	-0.429772
g__unclassified_f__Streptococcaceae	g__Atopobium	0.470654
g__unclassified_f__Streptococcaceae	g__Peptostreptococcus	0.443331
g__unclassified_f__Streptococcaceae	g__Fusobacterium	0.516815
g__unclassified_f__Streptococcaceae	g__Alloscardovia	0.490218
g__unclassified_f__Streptococcaceae	g__Bifidobacterium	0.59894
g__unclassified_f__Streptococcaceae	g__Streptococcus	0.592559
g__unclassified_f__Streptococcaceae	g__unclassified_o__Lactobacillales	0.706349
g__Lactobacillus	g__Granulicatella	0.544864
g__Lactobacillus	g__Prevotella	0.735595
g__Lactobacillus	g__norank_f__Muribaculaceae	0.436402
g__Lactobacillus	g__Atopobium	0.497388
g__Lactobacillus	g__Peptostreptococcus	0.390179
g__Lactobacillus	g__Fusobacterium	0.584122
g__Lactobacillus	g__Parvimonas	0.494876
g__Lactobacillus	g__Rothia	0.53056
g__Lactobacillus	g__Alloscardovia	0.555789
g__Lactobacillus	g__Bifidobacterium	0.771644
g__Lactobacillus	g__Streptococcus	0.638727
g__Granulicatella	g__Prevotella	0.596169
g__Granulicatella	g__norank_f__Muribaculaceae	0.412042
g__Granulicatella	g__Atopobium	0.733044
g__Granulicatella	g__Peptostreptococcus	0.781076
g__Granulicatella	g__Enterococcus	-0.430418
g__Granulicatella	g__Fusobacterium	0.869777
g__Granulicatella	g__Parvimonas	0.562325
g__Granulicatella	g__Solobacterium	0.726483
g__Granulicatella	g__Rothia	0.803033
g__Granulicatella	g__Acinetobacter	0.423994
g__Granulicatella	g__Gemella	0.646584
g__Granulicatella	g__Alloscardovia	0.509661
g__Granulicatella	g__Bifidobacterium	0.450443
g__Granulicatella	g__Streptococcus	0.824691
g__Granulicatella	g__Corynebacterium	0.437049
g__Prevotella	g__Atopobium	0.543541
g__Prevotella	g__Peptostreptococcus	0.489724
g__Prevotella	g__Fusobacterium	0.531492
g__Prevotella	g__Parvimonas	0.460993
g__Prevotella	g__Rothia	0.704602
g__Prevotella	g__Alloscardovia	0.452416
g__Prevotella	g__Bifidobacterium	0.587746
g__Prevotella	g__Streptococcus	0.645732
g__Prevotella	g__Corynebacterium	0.468353
g__Prevotella	g__unclassified_o__Lactobacillales	0.435087
g__norank_f__Muribaculaceae	g__Solobacterium	0.398853
g__norank_f__Muribaculaceae	g__Acinetobacter	0.726211
g__norank_f__Muribaculaceae	g__Rikenellaceae_RC9_gut_group	0.643142
g__norank_f__Muribaculaceae	g__Gemella	0.568322
g__norank_f__Muribaculaceae	g__Streptococcus	0.423657
g__norank_f__Muribaculaceae	g__Clostridium_sensu_stricto_1	0.660017
g__norank_f__Muribaculaceae	g__Prevotellaceae_NK3B31_group	0.427147
g__norank_f__Muribaculaceae	g__Corynebacterium	0.40616
g__unclassified_k__norank_d__Bacteria	g__Acinetobacter	0.540576
g__unclassified_k__norank_d__Bacteria	g__Rikenellaceae_RC9_gut_group	0.460925
g__Atopobium	g__Peptostreptococcus	0.833632
g__Atopobium	g__Fusobacterium	0.873599
g__Atopobium	g__Parvimonas	0.619357
g__Atopobium	g__Solobacterium	0.657845
g__Atopobium	g__Rothia	0.744328
g__Atopobium	g__Gemella	0.431997
g__Atopobium	g__Alloscardovia	0.760853
g__Atopobium	g__Streptococcus	0.704132
g__Atopobium	g__unclassified_o__Lactobacillales	0.566608
g__Peptostreptococcus	g__Fusobacterium	0.801131
g__Peptostreptococcus	g__Parvimonas	0.695455
g__Peptostreptococcus	g__Solobacterium	0.638347
g__Peptostreptococcus	g__Rothia	0.728113
g__Peptostreptococcus	g__Gemella	0.42333
g__Peptostreptococcus	g__Alloscardovia	0.680522
g__Peptostreptococcus	g__Streptococcus	0.754521
g__Peptostreptococcus	g__unclassified_o__Lactobacillales	0.406184
g__Rhodococcus	g__Corynebacterium	0.415373
g__Rhodococcus	g__Alloscardovia	-0.459821
g__Enterococcus	g__Raoultella	-0.578776
g__Enterococcus	g__Enterobacter	-0.744353
g__Fusobacterium	g__Parvimonas	0.713603
g__Fusobacterium	g__Solobacterium	0.71589
g__Fusobacterium	g__Rothia	0.721943
g__Fusobacterium	g__Gemella	0.567337
g__Fusobacterium	g__Alloscardovia	0.637155
g__Fusobacterium	g__Bifidobacterium	0.497171
g__Fusobacterium	g__Streptococcus	0.817095
g__Fusobacterium	g__unclassified_o__Lactobacillales	0.39486
g__Parvimonas	g__Rothia	0.615873
g__Parvimonas	g__Alloscardovia	0.557582
g__Parvimonas	g__Bifidobacterium	0.512653
g__Parvimonas	g__Streptococcus	0.60353
g__Solobacterium	g__Rothia	0.432846
g__Solobacterium	g__Gemella	0.753745
g__Solobacterium	g__Streptococcus	0.657748
g__Solobacterium	g__Corynebacterium	0.407828
g__Rothia	g__Enterobacter	0.388598
g__Rothia	g__Gemella	0.437251
g__Rothia	g__Alloscardovia	0.610892
g__Rothia	g__Bifidobacterium	0.395847
g__Rothia	g__Streptococcus	0.62899
g__Rothia	g__Corynebacterium	0.494744
g__Acinetobacter	g__Rikenellaceae_RC9_gut_group	0.540838
g__Acinetobacter	g__Gemella	0.599098
g__Acinetobacter	g__Clostridium_sensu_stricto_1	0.683047
g__Acinetobacter	g__Prevotellaceae_NK3B31_group	0.41609
g__Acinetobacter	g__Corynebacterium	0.471983
g__Rikenellaceae_RC9_gut_group	g__Prevotellaceae_NK3B31_group	0.457439
g__Enterobacter	g__Raoultella	0.744147
g__Gemella	g__Streptococcus	0.582177
g__Gemella	g__Corynebacterium	0.487575
g__Alloscardovia	g__Bifidobacterium	0.487099
g__Alloscardovia	g__Streptococcus	0.458846
g__Alloscardovia	g__unclassified_o__Lactobacillales	0.701584
g__Bifidobacterium	g__Streptococcus	0.586321
g__Streptococcus	g__Corynebacterium	0.450444
g__Streptococcus	g__unclassified_o__Lactobacillales	0.437687

## Sheet: degree_clustering (Cs-infected)
Table S2(7).The table of species correlation network node attribute in Cs-infected group.
node_name	degree	clustering
g__Neisseria	6	0.33333
g__unclassified_p__Proteobacteria	4	0.66667
g__Actinomyces	9	0.69444
g__Veillonella	8	0.85714
g__Granulicatella	9	0.75
g__norank_f__Muribaculaceae	4	0.5
g__Escherichia-Shigella	5	0.2
g__Bacteroides	5	0.5
g__unclassified_k__norank_d__Bacteria	6	0.4
g__Atopobium	9	0.61111
g__Stenotrophomonas	4	0.66667
g__Peptostreptococcus	8	0.85714
g__Pseudomonas	3	1
g__Ralstonia	6	0.4
g__Rhodococcus	3	0.33333
g__Fusobacterium	8	0.85714
g__Aerococcus	2	1
g__Rothia	4	1
g__Acinetobacter	2	1
g__Enterobacter	3	0
g__Gemella	8	0.85714
g__Streptococcus	9	0.69444
g__norank_f__Mitochondria	4	0.33333
g__Tumebacillus	1	0
g__Raoultella	6	0.46667
g__Staphylococcus	2	1
g__Actinobacillus	1	0
g__Psychrobacter	1	0

## Sheet: degree_clustering (Non-infected
Table S2(8).The table of species correlation network node attribute in Non-infected group.
node_name	degree	clustering
g__Actinomyces	15	0.82857
g__Olsenella	16	0.75
g__Veillonella	18	0.71242
g__Escherichia-Shigella	13	0.66667
g__unclassified_f__Streptococcaceae	10	0.68889
g__Lactobacillus	15	0.82857
g__Granulicatella	20	0.61053
g__Prevotella	16	0.78333
g__norank_f__Muribaculaceae	11	0.43636
g__unclassified_k__norank_d__Bacteria	3	0.33333
g__Atopobium	16	0.78333
g__Peptostreptococcus	17	0.75
g__Rhodococcus	3	0.33333
g__Enterococcus	3	0.33333
g__Fusobacterium	18	0.73856
g__Parvimonas	14	0.92308
g__Solobacterium	11	0.81818
g__Rothia	18	0.68627
g__Acinetobacter	10	0.4
g__Rikenellaceae_RC9_gut_group	4	0.66667
g__Enterobacter	3	0.33333
g__Gemella	12	0.74242
g__Alloscardovia	16	0.75
g__Bifidobacterium	12	0.86364
g__Streptococcus	20	0.65789
g__Clostridium_sensu_stricto_1	3	1
g__Prevotellaceae_NK3B31_group	3	1
g__Raoultella	2	1
g__Corynebacterium	10	0.6
g__unclassified_o__Lactobacillales	8	0.96429

## Sheet: betweenness_centrality (Cs-infe
Table S2(9).The table of species correlation network node center coefficient in Cs-infected group.
Node_ID	Node_Name	Degree_Centrality	Closeness_Centrality	Betweenness_Centrality
1	g__Neisseria	0.22222	0.44516	0.21667
2	g__unclassified_p__Proteobacteria	0.14815	0.35073	0.00888
3	g__Actinomyces	0.33333	0.45389	0.14715
4	g__Veillonella	0.2963	0.3858	0.00798
5	g__Granulicatella	0.33333	0.39234	0.02104
6	g__norank_f__Muribaculaceae	0.14815	0.36743	0.11662
7	g__Escherichia-Shigella	0.18519	0.39234	0.21847
8	g__Bacteroides	0.18519	0.35613	0.06676
9	g__unclassified_k__norank_d__Bacteria	0.22222	0.39234	0.08291
10	g__Atopobium	0.33333	0.45389	0.13219
11	g__Stenotrophomonas	0.14815	0.33548	0.02407
12	g__Peptostreptococcus	0.2963	0.3858	0.00798
13	g__Pseudomonas	0.11111	0.30458	0
14	g__Ralstonia	0.22222	0.39234	0.09069
15	g__Rhodococcus	0.11111	0.33548	0.06838
16	g__Fusobacterium	0.2963	0.3858	0.00508
17	g__Aerococcus	0.07407	0.28229	0
18	g__Rothia	0.14815	0.3171	0
19	g__Acinetobacter	0.07407	0.28935	0
20	g__Enterobacter	0.11111	0.3858	0.06016
21	g__Gemella	0.2963	0.3858	0.00508
22	g__Streptococcus	0.33333	0.43676	0.09141
23	g__norank_f__Mitochondria	0.14815	0.35073	0.04065
24	g__Tumebacillus	0.03704	0.2489	0
25	g__Raoultella	0.22222	0.40611	0.06078
26	g__Staphylococcus	0.07407	0.28229	0
27	g__Actinobacillus	0.03704	0.03704	0
28	g__Psychrobacter	0.03704	0.03704	0

## Sheet: betweenness_centrality (Non-inf
Table S2(10).The table of species correlation network node center coefficient in Non-infected group.
Node_ID	Node_Name	Degree_Centrality	Closeness_Centrality	Betweenness_Centrality
1	g__Actinomyces	0.51724	0.61702	0.00786
2	g__Olsenella	0.55172	0.63043	0.02747
3	g__Veillonella	0.62069	0.70732	0.03022
4	g__Escherichia-Shigella	0.44828	0.61702	0.05103
5	g__unclassified_f__Streptococcaceae	0.34483	0.53704	0.03769
6	g__Lactobacillus	0.51724	0.64444	0.01583
7	g__Granulicatella	0.68966	0.76316	0.14553
8	g__Prevotella	0.55172	0.63043	0.01281
9	g__norank_f__Muribaculaceae	0.37931	0.59184	0.08847
10	g__unclassified_k__norank_d__Bacteria	0.10345	0.43939	0.01043
11	g__Atopobium	0.55172	0.63043	0.01249
12	g__Peptostreptococcus	0.58621	0.65909	0.01722
13	g__Rhodococcus	0.10345	0.45313	0.00082
14	g__Enterococcus	0.10345	0.46774	0.04285
15	g__Fusobacterium	0.62069	0.67442	0.01927
16	g__Parvimonas	0.48276	0.60417	0.00249
17	g__Solobacterium	0.37931	0.59184	0.00734
18	g__Rothia	0.62069	0.67442	0.09637
19	g__Acinetobacter	0.34483	0.56863	0.08524
20	g__Rikenellaceae_RC9_gut_group	0.13793	0.40845	0.0037
21	g__Enterobacter	0.10345	0.43284	0.02771
22	g__Gemella	0.41379	0.61702	0.01614
23	g__Alloscardovia	0.55172	0.63043	0.02747
24	g__Bifidobacterium	0.41379	0.59184	0.00573
25	g__Streptococcus	0.68966	0.74359	0.05091
26	g__Clostridium_sensu_stricto_1	0.10345	0.43939	0
27	g__Prevotellaceae_NK3B31_group	0.10345	0.39726	0
28	g__Raoultella	0.06897	0.32955	0
29	g__Corynebacterium	0.34483	0.59184	0.03329
30	g__unclassified_o__Lactobacillales	0.27586	0.5	0.00046
