# Supplementary material for: Profiles of biliary microbiota in biliary obstruction patients with Clonorchis sinensis infection
Source: Frontiers journal article supplement (doi:10.3389/fcimb.2023.1281745), 2023-12-18
Supplement: Table_3.xlsx [file Table_3.xlsx]

## Sheet: corr
Table S3(1). The correlation coefficient matrix between the top 30 abundant bacterialgenera and the significant altered 35 metabolites (VIP>2, P<0.05) by Spearman’analysis in Cs-infected and Non-infected groups.
name	Pulcherosine	Spermidine	Phenylethyl primeveroside	5,10-Methenyltetrahydrofolic acid	Menthol-glucoronide	Ptelatoside B	Nalidixic acid	Caffeine	Spironolactone	Arginyl-Proline	Xanthosine	2,3-octadienoylglycine	Glutamylcysteine	S-4-Hydroxymephenytoin	1,1'-Ethylidenebistryptophan	Phytocassane E	Tryptophyl-Alanine	6'-Apiosyllotaustralin	Alanyltryptophan	Tryptophyl-Glycine	P-HPEA-EDA	Pyridine N-oxide glucuronide	AG-99	1-Methylinosine	Chondroitin D-glucuronate	Cysteinyl-Glutamine	Annuolide E	Tetrahydro-2-furanmethanol	Idarubicin	Pteroside Z	Prolyl-Gamma-glutamate	Mammea B/AD cyclo D	Aspartyl-Tryptophan	Miltirone	Edulisin VI
g__Enterococcus	0.07512	-0.25459	-0.29466	-0.25831	-0.39098	-0.45403	-0.14416	-0.28364	-0.41736	-0.38237	-0.20836	0.18668	0.33468	0.19683	0.32731	0.27226	0.2409	0.2367	0.40215	0.29703	0.28072	0.53825	0.59365	0.51204	0.63085	0.52866	0.61288	0.5189	0.27281	-0.02386	0.26296	0.34132	0.19655	0.24287	0.23658
g__Enterobacter	-0.54419	-0.15484	-0.05985	-0.19636	-0.3004	-0.03927	-0.31372	-0.06929	-0.44097	0.18121	0.01447	-0.12071	-0.10393	0.13923	0.09258	0.31614	0.37394	0.16303	0.14916	0.0934	-0.16229	-0.20315	-0.19935	-0.17416	-0.32114	-0.36432	-0.13663	-0.37881	-0.00755	0.1693	-0.09599	0.07979	0.26987	0.07728	0.27334
g__Streptococcus	-0.09127	-0.12134	-0.01816	-0.05582	0.2146	0.00569	-0.02566	0.22957	0.33951	-0.0146	-0.00542	0.23836	0.064	0.17138	-0.00215	-0.14008	-0.0279	0.00942	-0.15036	-0.0646	0.12417	-0.08284	-0.19504	-0.06027	-0.02656	0.07399	-0.03654	0.14122	-0.0329	0.18701	0.13164	-0.10426	0.02369	-0.05182	-0.09194
g__Escherichia-Shigella	0.01047	0.00527	0.03328	-0.00439	0.03735	0.1231	-0.05242	0.13794	0.04403	-0.03458	-0.16762	0.06739	-0.04179	-0.30319	-0.18576	-0.04266	-0.28178	-0.06062	-0.06216	0.02106	-0.03497	0.06949	-0.04327	-0.04482	-0.09504	-0.02571	0.02031	-9e-05	0.15547	0.17329	0.16504	0.14618	0.00261	-0.02384	-0.258
g__Pseudomonas	-0.02651	0.16674	0.02172	-0.00632	0.3391	0.22266	0.15393	-0.00526	0.16277	0.12607	-0.12025	-0.18287	-0.27203	-0.29832	-0.24863	-0.10776	-0.08753	-0.1162	-0.03872	-0.11644	0.03109	-0.23875	-0.16934	-0.27551	-0.19728	-0.1836	-0.17669	-0.20604	-0.10178	-0.15517	-0.0467	-0.12117	-0.05829	0.02377	-0.22053
g__Acinetobacter	0.29581	0.1938	0.35615	0.33272	0.20647	0.23856	0.2293	0.02008	0.3572	0.18384	0.25575	-0.2053	-0.24199	-0.13076	-0.19954	-0.38903	-0.3274	-0.23765	-0.35936	-0.0928	-0.30412	-0.12872	-0.17139	-0.06252	-0.11186	-0.09988	-0.31072	-0.12939	-0.03598	-0.21735	-0.21424	-0.08341	-0.20157	-0.42478	-0.2835
g__Psychrobacter	0.08885	-0.0339	-0.0108	0.0667	0.15933	0.12292	0.10978	-0.11068	0.1501	0.10869	0.01836	-0.18584	0.06414	-0.15541	-0.21338	-0.12032	-0.04898	-0.22056	-0.15417	-0.24495	-0.27904	-0.11994	-0.16096	-0.20316	-0.19268	-0.09374	-0.13716	-0.0358	-0.16771	0.14432	0.03188	-0.26792	-0.01982	-0.28101	0.05566
g__Gemella	0.0326	0.08492	-0.00999	-0.14905	-0.16338	-0.17392	0.03179	0.3959	0.08193	0.14927	0.13726	0.37057	0.23967	0.34598	0.3645	0.19256	0.22144	0.19595	0.27334	0.24482	0.16409	0.09639	0.20198	0.23726	0.31678	0.16442	0.23243	-0.24665	-0.22387	-0.0861	-0.01304	-0.12947	-0.15075	-0.04011	-0.07452
g__unclassified_k__norank_d__Bacteria	0.35581	0.39529	0.31368	0.42495	0.31035	0.20797	0.31015	0.02481	0.22578	0.14924	0.19691	-0.18604	-0.35703	-0.25796	-0.22754	-0.38583	-0.33111	-0.26136	-0.28874	-0.1833	-0.15228	-0.23527	-0.23706	-0.24197	-0.19421	-0.15125	-0.38049	-0.21075	-0.18835	-0.35666	-0.35201	-0.25756	-0.42707	-0.05542	-0.11267
g__Rhodococcus	0.18534	0.17317	0.32689	0.27224	0.26235	0.18252	0.18328	0.0943	0.25462	-0.05895	0.19507	-0.05714	0.01362	-0.0789	-0.08078	-0.2271	-0.21551	-0.15804	-0.27202	-0.28175	0.07089	-0.05338	-0.15537	-0.06576	-0.12582	-0.16357	-0.25552	0.00892	-0.0593	-0.11272	-0.17087	-0.18634	-0.2575	0.11464	-0.1028
g__Granulicatella	-0.0869	0.04193	-0.23398	-0.1716	0.20464	-0.00374	0.00058	-0.05181	0.09798	0.09679	-0.2412	0.22145	0.0267	0.17219	-0.02311	0.02564	0.12695	0.09651	0.12065	0.15325	0.05112	-0.12708	0.05586	-0.0537	-0.0595	0.04262	0.00505	-0.08607	-0.06678	0.09043	0.1911	-0.014	0.11349	0.01897	-0.21027
g__Peptostreptococcus	-0.0452	0.00873	0.00793	-0.05079	-0.10084	-0.29848	-0.33319	0.14483	0.18245	0.11804	0.23064	0.46841	0.40873	0.45884	0.64123	0.20885	0.19152	0.46695	0.24058	0.29109	0.29915	0.06099	0.1786	0.19968	0.17584	0.12542	0.14716	-0.08942	-0.04636	0.14139	0.24433	0.14632	0.10831	-0.01758	0.12489
g__Actinomyces	0.00102	0.02058	0.13363	-0.03922	-0.02719	-0.08292	-0.13716	0.23198	0.15809	-0.03338	0.16853	0.3465	0.33739	0.32811	0.35201	0.18158	0.14347	0.13225	0.14671	0.18828	0.26596	0.15094	0.15824	0.17787	0.2093	0.10198	0.12248	-0.05028	0.02208	0.05603	0.09283	0.07197	0.02746	0.07646	0.1326
g__Raoultella	-0.07452	-0.01854	-0.10969	0.04381	-0.10335	0.09636	0.20112	0.02186	-0.19508	-0.0311	0.15444	-0.12159	-0.17073	0.1021	0.04785	0.18045	0.06664	-0.07692	-0.18585	-0.34139	-0.24134	-0.17806	-0.20853	-0.12846	-0.17162	0.06912	0.02993	-0.0294	0.06484	0.16673	-0.31011	-0.17123	-0.1151	0.1258	0.16232
g__Staphylococcus	0.04177	0.11663	0.06229	0.05658	0.15936	0.07236	0.06278	0.26901	0.11596	0.04797	0.06904	0.1312	-0.03923	-0.18287	-0.10405	0.01656	-0.26681	-0.02804	0.06669	0.01189	-0.05118	-0.00365	-0.04794	-0.08703	-0.16818	-0.02032	-0.00091	-0.12521	-0.0537	0.1499	0.11878	0.03674	-0.01114	0.01911	-0.25034
g__Stenotrophomonas	0.0016	0.20548	0.04553	0.02983	0.36383	0.22806	0.16922	-0.03247	0.16745	0.15236	-0.11181	-0.17768	-0.29121	-0.32489	-0.24991	-0.10795	-0.08815	-0.11801	-0.02856	-0.12318	-0.0093	-0.25728	-0.16998	-0.26668	-0.22571	-0.18087	-0.20742	-0.23906	-0.12185	-0.17995	-0.06943	-0.14578	-0.07262	0.01558	-0.23605
g__unclassified_f__Streptococcaceae	-0.051	-0.08149	-0.05951	-0.05358	-0.04594	-0.24341	-0.22275	-0.04755	0.09912	0.09529	0.12344	0.38789	0.24933	0.27571	0.43752	0.15423	0.10944	0.35044	0.13994	0.2378	0.1723	0.01664	0.10203	0.07922	0.03875	0.07865	0.08003	0.04924	-0.00903	0.13497	0.23027	0.16357	0.15644	0.00362	0.19617
g__unclassified_o__Lactobacillales	-0.06208	-0.07092	-0.08196	-0.05409	-0.03878	-0.25486	-0.23786	-0.05535	0.09333	0.09198	0.11789	0.38564	0.2458	0.26954	0.44364	0.15503	0.10878	0.35399	0.14598	0.231	0.16344	0.02082	0.10158	0.06624	0.02291	0.07254	0.07707	0.03019	0.00059	0.14647	0.23455	0.1611	0.15981	0.01019	0.2003
g__Veillonella	0.03824	0.05364	0.15547	-0.03503	-0.0603	-0.12897	-0.12869	0.27174	0.17863	0.0532	0.2079	0.41668	0.3543	0.37726	0.43713	0.20611	0.17344	0.20344	0.19746	0.25225	0.28022	0.12825	0.1836	0.21542	0.25884	0.13801	0.14155	-0.10962	-0.05949	0.01237	0.08345	0.04161	-0.00955	0.03245	0.08347
g__Corynebacterium	-0.0176	-0.0445	0.15361	0.03342	0.07017	0.01469	-0.14005	0.05132	0.1233	-0.17039	0.10301	0.17647	0.249	0.15796	0.14692	0.0987	0.02209	-0.01489	-0.01633	0.04347	0.20545	0.14534	0.06239	0.06484	0.05518	0.01751	0.0151	0.11734	0.18369	0.11489	0.09395	0.14466	0.10774	0.14532	0.22133
g__Ralstonia	0.15689	0.29593	0.04484	0.09149	0.41613	0.36943	0.20683	0.08122	0.31421	0.20692	0.10372	-0.28789	-0.28755	-0.34763	-0.32037	-0.28559	-0.37068	-0.31242	-0.32712	-0.24415	-0.06096	-0.30307	-0.25987	-0.27976	-0.2301	-0.28422	-0.43432	-0.206	-0.24201	-0.39379	-0.37032	-0.30737	-0.20222	0.05256	-0.12101
g__Rothia	0.0754	0.11802	0.10551	-0.0646	-0.05284	-0.13578	-0.0093	0.35446	0.15785	0.07291	0.19191	0.41059	0.29669	0.33302	0.36793	0.18926	0.15681	0.13897	0.21071	0.22459	0.24865	0.1335	0.19095	0.19392	0.27669	0.13095	0.15882	-0.19305	-0.14284	-0.07329	-0.00808	-0.07932	-0.14565	0.05906	0.03426
g__Clostridium_sensu_stricto_1	0.07226	0.10761	-0.08039	-0.13769	-0.07195	-0.01897	0.12217	0.00498	-0.11611	0.16945	-0.06647	0.31645	0.06823	0.14375	0.14993	0.12185	0.18126	0.28987	0.22432	0.22676	0.11175	-0.06464	0.08914	0.02737	0.03897	0.08281	0.09888	-0.09419	-0.10693	0.07382	0.07457	0.01737	0.07148	0.12185	-0.13939
g__Aerococcus	-0.02034	0.02928	0.07069	0.04068	0.09888	0.03082	0.03548	0.28912	0.13311	0.00898	-0.08191	0.10592	-0.07575	-0.20837	-0.07092	-0.07444	-0.31454	0.02179	-0.01295	0.07645	0.03831	0.01714	-0.12356	-0.08985	-0.09106	0.03124	0.03189	-0.0503	0.06944	0.17672	0.181	0.15456	0.01307	-0.0753	-0.31633
g__Actinobacillus	0.08401	0.00046	-0.00926	0.0494	0.13867	0.10108	0.08112	-0.10527	0.12494	0.10197	0.02384	-0.20217	0.06637	-0.11404	-0.17926	-0.02466	-0.01382	-0.18733	-0.1298	-0.20957	-0.17397	-0.12246	-0.19213	-0.15097	-0.16233	-0.12419	-0.11075	-0.03116	-0.17336	0.11467	0.04457	-0.1443	-0.02182	-0.20122	0.04041
g__norank_f__Muribaculaceae	0.17797	0.01557	0.17931	0.178	0.13174	0.08754	-0.07383	-0.08519	-0.19504	-0.14188	-0.17138	0.00926	0.11287	-0.19242	-0.1661	-0.01795	-0.0384	-0.15519	-0.2321	-0.20486	0.02973	-0.01508	0.01739	0.00933	-0.08205	0.0053	-0.04482	-0.02664	0.16897	0.06801	-0.11692	-0.06353	-0.06071	0.1348	0.04437
g__Lactobacillus	0.12064	-0.06818	0.1396	0.06044	-0.06061	-0.19336	-0.18652	-0.13228	0.0026	-0.0025	0.15139	0.37386	0.32516	0.21991	0.34824	0.11431	0.05556	0.28582	0.01708	0.13789	0.23545	0.07402	0.10383	0.11625	0.04316	0.09003	0.0513	0.17931	0.05857	0.16804	0.14569	0.18246	0.13076	0.12955	0.25862
g__Neisseria	0.25205	0.31514	0.22609	0.32977	0.25209	0.14776	0.22168	0.04562	0.16344	0.05331	0.13972	-0.1029	-0.25258	-0.18724	-0.16321	-0.27896	-0.2691	-0.19967	-0.20676	-0.14285	0.01208	-0.17209	-0.21959	-0.24222	-0.15685	-0.14145	-0.30891	-0.12881	-0.12951	-0.2745	-0.26622	-0.20813	-0.35235	0.08111	0.02714
g__Atopobium	0.00686	0.03194	0.10637	-0.08513	-0.09898	-0.12884	-0.12914	0.28276	0.15451	0.06288	0.18908	0.41525	0.36196	0.39738	0.45726	0.2245	0.21007	0.24208	0.23555	0.27338	0.27555	0.12849	0.20638	0.22932	0.27973	0.14596	0.17857	-0.11699	-0.07645	0.02789	0.10858	0.04706	0.00634	0.01857	0.06796
g__Fusobacterium	0.04628	-0.02929	0.01632	-0.06088	-0.04825	-0.33366	0.00069	0.3856	0.21076	-0.03627	0.16084	0.49511	0.26789	0.35195	0.26137	0.06011	0.05359	0.01155	0.03009	0.15886	0.2383	0.17278	0.06493	0.19071	0.26616	0.1888	0.17525	-0.02237	-0.01677	-0.05768	-0.00801	-0.09315	-0.18945	0.05034	0.1096

## Sheet: pvalue
Table S3(2).The correlation coefficient matrix between the top 30 abundant bacterialgenera and the significant altered 35 metabolites (VIP>2, P<0.05) by Spearman’analysis in Cs-infected and Non-infected groups.
name	Caffeine	Arginyl-Proline	Xanthosine	Spironolactone	Menthol-glucoronide	Ptelatoside B	Nalidixic acid	Pulcherosine	Spermidine	Phenylethyl primeveroside	5,10-Methenyltetrahydrofolic acid	2,3-octadienoylglycine	Glutamylcysteine	S-4-Hydroxymephenytoin	1,1'-Ethylidenebistryptophan	Edulisin VI	6'-Apiosyllotaustralin	Alanyltryptophan	Phytocassane E	Tryptophyl-Alanine	Pyridine N-oxide glucuronide	Cysteinyl-Glutamine	Tryptophyl-Glycine	AG-99	Annuolide E	1-Methylinosine	Chondroitin D-glucuronate	Aspartyl-Tryptophan	Mammea B/AD cyclo D	Prolyl-Gamma-glutamate	Miltirone	P-HPEA-EDA	Tetrahydro-2-furanmethanol	Idarubicin	Pteroside Z
g__Enterococcus	0.00968	0.00463	0.19056	0.0054	0.00864	0.00016	0.12427	0.5575	0.21188	0.15126	0.02065	0.00105	7e-05	0.00137	0.00049	0.11968	0.01961	0.00643	0.01509	0.00739	1e-05	2e-05	0.03786	1e-05	1e-05	2e-05	3e-05	0.06326	0.0399	0.35311	0.10282	0.0011	0.00234	0.15562	0.13914
g__Enterobacter	0.81258	0.13828	0.02477	0.57521	0.97755	0.60157	0.20359	0.31876	0.61599	0.12835	0.66108	0.95617	0.3966	0.58249	0.98178	0.12242	0.52914	0.85134	0.23218	0.92825	0.11247	0.00385	0.64123	0.41055	0.25067	0.53242	0.01656	0.50161	0.9794	0.67838	0.76261	0.1118	0.00969	0.5809	0.52835
g__Streptococcus	0.81489	0.44026	0.30539	0.01369	0.00371	0.45626	0.56866	0.72973	0.23048	0.56595	0.62633	0.03499	0.5958	0.52589	0.81079	0.63933	0.29759	0.15764	0.2752	0.40695	0.74697	0.89137	0.28338	0.18112	0.45605	0.49379	0.52959	0.76211	0.35064	0.83709	0.4995	0.53037	0.71804	0.24859	0.5712
g__Escherichia-Shigella	0.85955	0.95797	0.96342	0.4735	0.11233	0.66006	0.49091	0.78076	0.40824	0.15735	0.50887	0.09551	0.89544	0.34992	0.39254	0.30681	0.77052	0.34	0.14771	0.10625	0.91415	0.77445	0.8032	0.61858	0.92529	0.80983	0.69724	0.49591	0.29396	0.2929	0.96506	0.73495	0.89761	0.78524	0.56931
g__Pseudomonas	0.29505	0.14395	0.34108	0.03383	0.00196	0.00698	0.02528	0.05593	0.01054	0.0523	0.48576	0.76613	0.09232	0.07618	0.01492	0.1798	0.01965	0.1309	0.10663	0.10903	0.19895	0.25503	0.4042	0.30898	0.2018	0.25737	0.26645	0.36842	0.34649	0.26157	0.71476	0.24486	0.18934	0.37963	0.32995
g__Acinetobacter	0.49953	0.5849	0.15533	0.00211	0.00019	0.0043	0.00735	0.02249	0.02327	0.00122	0.01947	0.29472	0.05852	0.05376	0.0018	0.01242	0.00707	0.00058	0.0302	0.0155	0.48776	0.30957	0.01715	0.01477	0.15534	0.14474	0.09221	0.05655	0.52872	0.1097	0.34404	0.30672	0.67356	0.48125	0.97853
g__Psychrobacter	0.21718	0.50679	0.63866	0.27751	0.02248	0.01513	0.04876	0.7236	0.79289	0.97354	0.14421	0.08777	0.03763	0.01845	0.0053	0.00775	0.07858	0.00903	0.00726	0.07995	0.0573	0.1894	0.00249	0.00564	0.00201	0.00218	0.00142	0.02049	0.00658	0.06561	0.01814	0.00388	0.17677	0.3791	0.63453
g__Gemella	0.38215	0.45642	0.60709	0.03618	0.02478	0.18933	0.43007	0.59114	0.18831	0.42551	0.33232	0.99676	0.48061	0.58475	0.13888	0.09717	0.02548	0.20661	0.18226	0.48757	0.27556	0.48394	0.30505	0.18364	0.09395	0.53582	0.35852	0.14457	0.14383	0.42224	0.50071	0.66484	0.16545	0.15206	0.44736
g__unclassified_k__norank_d__Bacteria	0.78388	0.86856	0.11965	0.13582	0.00176	0.00016	0.00231	0.0167	0.02861	0.01119	0.03015	0.07434	0.00539	0.00147	0.00199	0.07941	0.01544	0.00135	0.07865	0.02151	0.12179	0.11062	0.00129	0.09728	0.05525	0.02149	0.02047	0.03374	0.19766	0.00056	0.85733	0.04424	0.54203	0.58433	0.83037
g__Rhodococcus	0.8414	0.66815	0.77084	0.02684	0.02684	0.00522	0.05977	0.46209	0.30832	0.03547	0.16538	0.03083	0.00465	0.00023	0.00029	0.02124	0.00746	0.00029	6e-05	0.00122	0.29085	0.31279	0.00082	0.00363	0.01099	0.00989	0.02932	0.00601	0.30719	0.05736	0.36895	0.94084	0.47851	0.75415	0.5358
g__Granulicatella	0.54181	0.2386	0.23358	0.00721	0.0106	0.27293	0.93338	0.85774	0.20081	0.60223	0.58977	0.11073	0.90116	0.99973	0.36446	0.48842	0.10818	0.23748	0.31676	0.34169	0.49405	0.30276	0.39043	0.40637	0.22975	0.4998	0.34524	0.85234	0.36261	0.87348	0.74708	0.96405	0.25818	0.15535	0.69663
g__Peptostreptococcus	0.99209	0.45586	0.35424	0.08131	0.13088	0.97008	0.25301	0.23947	0.49265	0.75402	0.93766	0.01094	0.52302	0.42725	0.46041	0.28243	0.90086	0.85398	0.77999	0.91124	0.80126	0.77076	0.97064	0.56819	0.64385	0.89582	0.46475	0.98871	0.80676	0.28937	0.84454	0.55813	0.19979	0.57739	0.59025
g__Actinomyces	0.22479	0.59092	0.21022	0.00679	0.02817	0.62077	0.73561	0.53187	0.51249	0.38801	0.63337	0.08031	0.64977	0.60995	0.95356	0.75808	0.47821	0.12111	0.55757	0.66037	0.82688	0.80994	0.87282	0.32628	0.49759	0.84233	0.95112	0.97365	0.70877	0.78016	0.83274	0.16369	0.38952	0.80256	0.61325
g__Raoultella	0.33445	0.46287	0.56019	0.3267	0.51938	0.78357	0.45314	0.09583	0.38726	0.39299	0.73395	0.76999	0.21236	0.90788	0.66259	0.64747	0.5522	0.42339	0.70662	0.99689	0.28408	0.38695	0.38139	0.24951	0.87348	0.37558	0.11197	0.81173	0.8465	0.82121	0.8454	0.10746	0.09473	0.63299	0.11759
g__Staphylococcus	0.5018	0.65072	0.47819	0.003	0.00167	0.0073	0.06233	0.33525	0.16095	0.08109	0.07901	0.16583	0.01164	0.00014	7e-05	0.00021	0.01239	0.0003	3e-05	0.00015	0.30373	0.0865	0.00444	0.00115	0.01908	0.00422	0.0064	0.04341	0.11598	0.2341	0.86523	0.1545	0.69302	0.37624	0.5612
g__Stenotrophomonas	0.23351	0.54446	0.40469	0.01619	0.01241	0.00223	0.02204	0.04773	0.00651	0.01495	0.1034	0.35958	0.0044	0.00057	0.0015	0.01906	0.01191	0.02693	0.00103	0.00101	0.14437	0.10923	0.14111	0.12812	0.02829	0.07643	0.02669	0.0205	0.29838	0.10147	0.66971	0.30348	0.18721	0.27619	0.03244
g__unclassified_f__Streptococcaceae	0.60212	0.86773	0.78513	0.22372	0.15507	0.00405	0.4229	0.45127	0.48361	0.07443	0.0956	0.00019	0.00805	0.00044	0.00016	0.37209	0.02956	0.01908	0.15212	0.118	0.14315	0.06443	0.00324	0.04852	0.04479	0.16683	0.03196	0.07862	0.17751	0.05832	0.41243	0.11582	0.57127	0.97022	0.17165
g__unclassified_o__Lactobacillales	0.70384	0.3818	0.6695	0.25741	0.10451	0.00385	0.29556	0.82685	0.30707	0.59427	0.19527	2e-05	0.00339	0.00521	0.00024	0.01465	0.25506	0.10299	0.15417	0.31349	0.02087	0.04581	0.03987	0.02867	0.02413	0.07663	0.05408	0.16252	0.25428	0.30731	0.07196	0.16976	0.41189	0.43053	0.0905
g__Veillonella	0.13199	0.63322	0.1372	0.00056	0.01003	0.33917	0.4829	0.80248	0.28968	0.00845	0.12478	0.0976	0.61866	0.75301	0.57058	0.0874	0.23873	0.01791	0.27792	0.14299	0.73544	0.70437	0.4768	0.07495	0.53136	0.40421	0.5378	0.4933	0.5595	0.83709	0.81028	0.41791	0.38722	0.44491	0.31126
g__Corynebacterium	0.13222	0.40282	0.15513	0.01072	0.0771	0.32497	0.32147	0.44664	0.1868	0.00424	0.14927	0.10181	0.85091	0.43675	0.64834	0.11661	0.18326	0.03819	0.16615	0.00971	0.69012	0.87798	0.28092	0.16292	0.33613	0.81607	0.7797	0.15071	0.8701	0.17877	0.46765	0.15747	0.80463	0.31697	0.69419
g__Ralstonia	0.48983	0.22322	0.26541	0.00269	0	0	0.00269	0.08428	0.0016	0.02859	0.09689	0.01104	0.00112	0.00043	0	0.02711	3e-05	0.00057	0.00049	0.00107	0.03077	0.01726	7e-05	0.00322	0.00062	0.00228	0.00062	0.00212	0.00473	0.00372	0.86466	0.07447	0.32225	0.05419	0.24272
g__Rothia	0.12388	0.37177	0.17961	0.00174	0.00452	0.19693	0.78606	0.94619	0.1599	0.16603	0.55372	0.14804	0.95198	0.50361	0.37478	0.18807	0.07313	0.09423	0.24042	0.08827	0.58723	0.66007	0.48511	0.28086	0.34158	0.48359	0.57963	0.56378	0.76548	0.90471	0.96715	0.46516	0.19289	0.20876	0.85835
g__Clostridium_sensu_stricto_1	0.5238	0.47283	0.93849	0.88361	0.08414	0.15758	0.47685	0.1738	0.00207	0.63157	0.72474	0.52643	0.596	0.19292	0.07973	0.10769	0.34748	0.55802	0.66908	0.9486	0.2185	0.80406	0.91183	0.26109	0.98911	0.79732	0.6542	0.95252	0.36328	0.38241	0.62536	0.3966	0.06231	0.06294	0.35829
g__Aerococcus	0.00782	0.65646	0.93414	0.13688	0.65002	0.47254	0.56701	0.91747	0.43016	0.5906	0.10139	0.45146	0.06389	0.02607	0.11875	0.01825	0.18849	0.15282	0.04485	0.00342	0.43766	0.38364	0.94476	0.07786	0.67686	0.20409	0.15244	0.11597	0.67406	0.3251	0.52953	0.5626	0.47809	0.4757	0.99238
g__Actinobacillus	0.07323	0.04991	0.40724	0.02085	0.05814	0.01354	0.05365	0.04335	0.36293	0.39858	0.06198	0.04048	0.31354	0.08176	0.00578	0.09624	0.00991	0.0846	0.02498	0.10306	0.36698	0.09904	0.00901	0.08753	0.0038	0.14614	0.00727	0.09002	0.00419	0.08249	0.00463	0.00071	0.39286	0.10084	0.53031
g__norank_f__Muribaculaceae	0.63951	0.67908	0.91601	0.16789	0.0054	0.15143	0.40773	0.13181	0.08091	0.03486	0.318	0.99068	0.93428	0.17824	0.05899	0.20583	0.29154	0.15681	0.0758	0.22309	0.59717	0.67077	0.55929	0.84565	0.67753	0.69947	0.97403	0.77157	0.56865	0.81427	0.24528	0.42547	0.67208	0.94414	0.87528
g__Lactobacillus	0.18967	0.72048	0.28283	0.36055	0.12504	0.52044	0.95383	0.12305	0.4417	0.05249	0.6011	0.16318	0.02642	0.53208	0.83832	0.24636	0.6913	0.68027	0.44476	0.98886	0.43597	0.92416	0.93892	0.23002	0.94542	0.24087	0.7338	0.30084	0.35531	0.79583	0.46656	0.21646	0.19838	0.57447	0.38137
g__Neisseria	0.8092	0.26758	0.24806	0.00118	0.00025	0.00489	0.45977	0.24928	0.00858	0.02732	0.17348	0.34315	0.15651	0.00575	0.02301	0.26901	0.03383	0.04368	0.10339	0.11284	0.11229	0.03626	0.08311	0.13426	0.02023	0.29092	0.14818	0.88951	0.52963	0.09762	0.42643	0.8599	0.43581	0.22486	0.59525
g__Atopobium	0.34479	0.34719	0.18653	0.01545	0.33812	0.81973	0.247	0.49986	0.97226	0.84188	0.96557	0.03525	0.1061	0.14362	0.22582	0.57843	0.79556	0.7897	0.99585	0.96047	0.76452	0.85817	0.75449	0.63936	0.75449	0.72456	0.53659	0.55719	0.86037	0.38738	0.95888	0.13242	0.73208	0.5284	0.78108
g__Fusobacterium	0.53725	0.42917	0.13783	0.01929	0.08991	0.86813	0.69088	0.75652	0.20767	0.31975	0.19213	0.15567	0.4815	0.54562	0.797	0.83398	0.19655	0.45774	0.46134	0.56502	0.52046	0.51315	0.78562	0.50045	0.33229	0.81387	0.51114	0.51833	0.60345	0.73312	0.82592	0.57626	0.33623	0.50757	0.48939
